# Supplementary material for: Structural insights into an atypical secretory pathway kinase crucial for Toxoplasma gondii invasion
Source: PubMed Central journal article supplement (PMC8213820; doi:10.1038/s41467-021-24083-y), 2021-06-18
Supplement: 41467_2021_24083_MOESM1_ESM.pdf [file 41467_2021_24083_MOESM1_ESM.pdf]

Supplementary Information for

**Structural insights into an atypical secretory pathway kinase  
crucial for *Toxoplasma gondii* invasion**

Gaëlle Lentini<sup>1†</sup>, Rouaa Ben Chaabene<sup>1†</sup>, Oscar Vadas<sup>1†</sup>, Chandra Ramakrishnan<sup>2</sup>,  
Budhaditya Mukherjee<sup>1,3</sup>, Ved Mehta<sup>4</sup>, Matteo Lunghi<sup>1</sup>, Jonas Grossmann<sup>5,6</sup>, Bohumil  
Maco<sup>1</sup>, Rémy Visentin<sup>1</sup>, Adrian B. Hehl<sup>2</sup>, Volodymyr M. Korkhov<sup>4,7,\*</sup> and Dominique  
Soldati-Favre<sup>1,\*</sup>

Correspondence to: dominique.soldati-favre@unige.ch, volodymyr.korkhov@psi.ch

†These authors contributed equally to the work

**This PDF file includes:**

Supplementary Figures 1 to 10

Supplementary Tables 1 to 6

Supplementary references

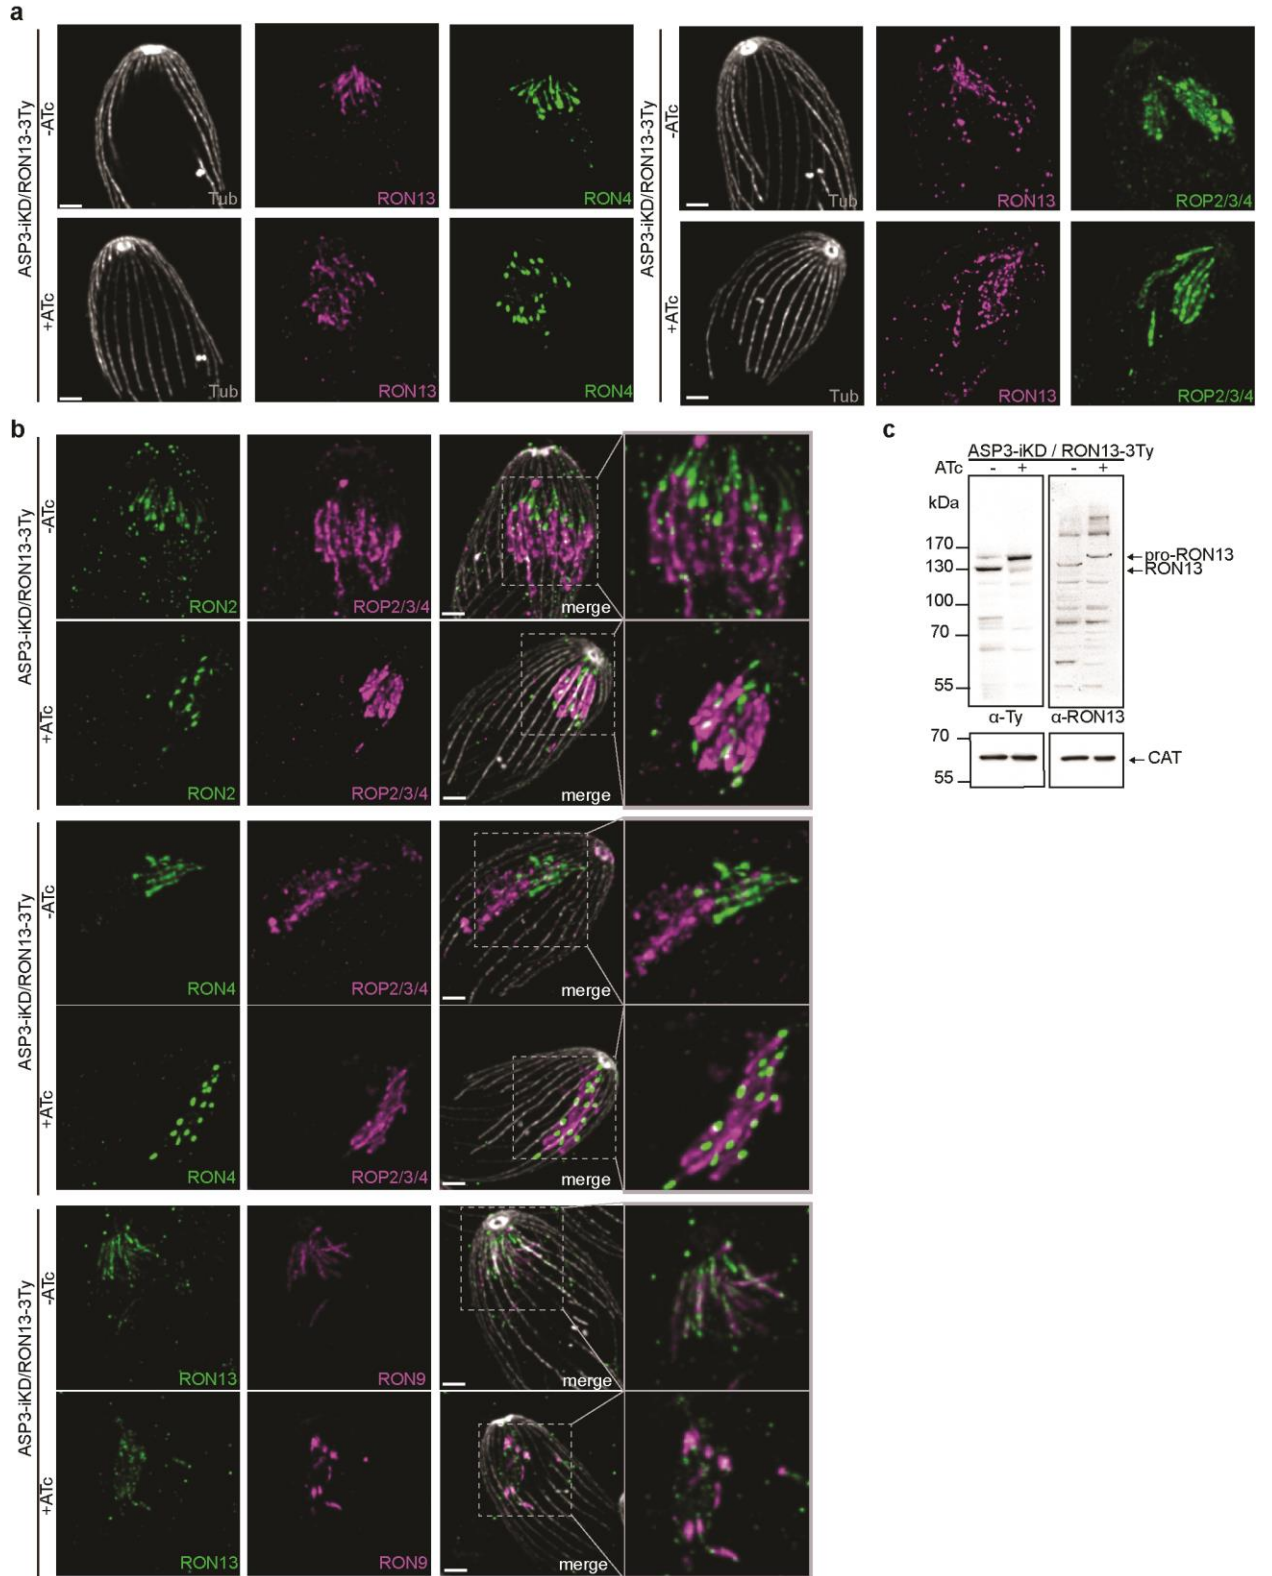

2 **Supplementary Fig. 1. ASP3 depletion impacts rhoptry morphology and content**

3 **localization. a.** U-ExM images of parasites from ASP3-iKD/RON13-3Ty extracellular  
4 parasites  $\pm$  anhydrotetracycline (ATc). The images presented here correspond to the  
5 individual channel merged in Figure 1a. ROP2/3/4 (green) antibodies are used to visualize  
6 the bulb of the rhoptries while RON4 (green) stains the neck of the rhoptries. RON13  
7 (magenta) is detected using anti-Ty antibodies and parasite subpellicular microtubules are  
8 detected with anti- $\alpha/\beta$  tubulin antibodies (grey). Scale bar = 2  $\mu$ m. Images representative of  
9 three biologically independent experiments. **b.** U-ExM images of rhoptries from ASP3-  
10 iKD/RON13-3Ty extracellular parasites  $\pm$ ATc. ROP2/3/4 (magenta) antibodies are used to  
11 visualize the bulb of the rhoptries while RON2 (green), RON4 (green), RON9 (magenta)  
12 antibodies stain the neck of the rhoptries. RON13 (green) is detected using anti-Ty  
13 antibodies. Scale bar = 2  $\mu$ m. Images representative of three biologically independent  
14 experiments. **c.** Immunoblot on ASP3-iKD/RON13-3Ty parasite lysates  $\pm$ ATc  
15 demonstrating that the RON13 antibodies generated recognize both pro and mature RON13.  
16 Catalase (anti-CAT) is used as a loading control. Image representative of three biologically  
17 independent experiments. Source data are provided as a Source data file.

18

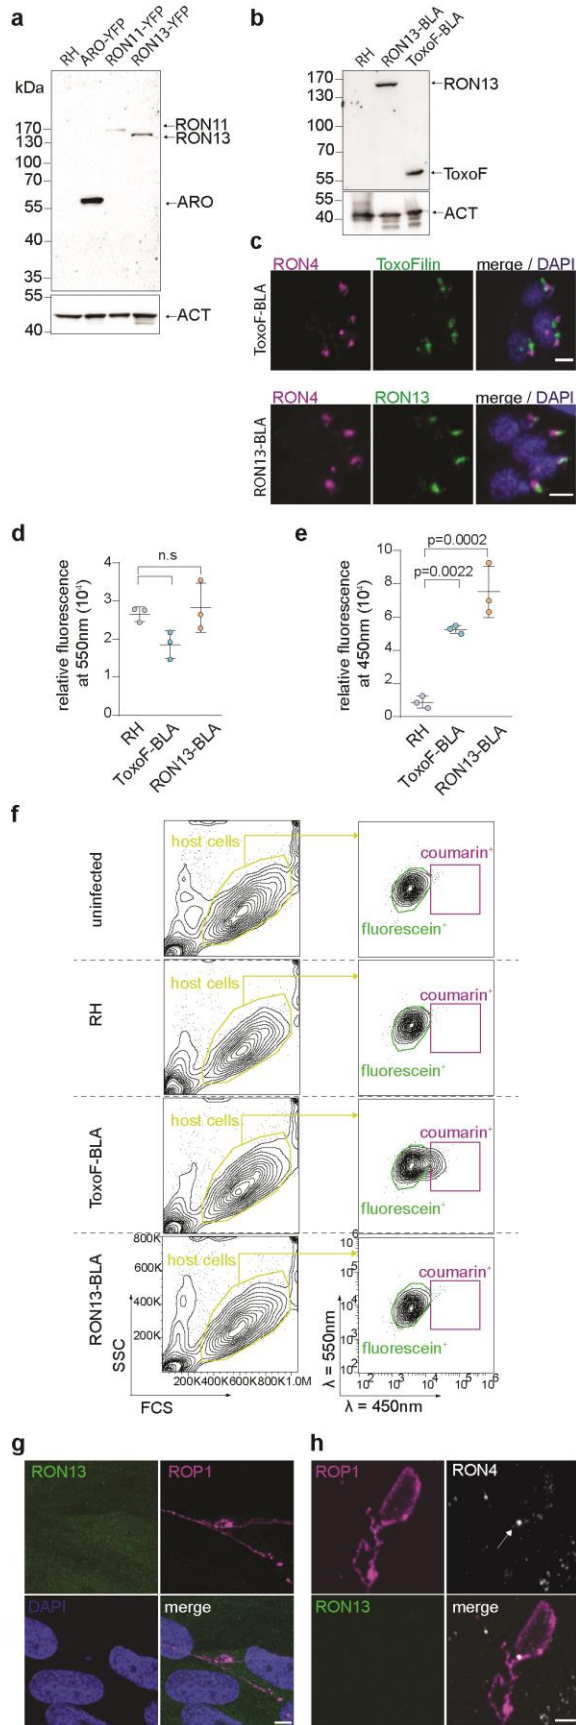

20 **Supplementary Fig. 2. RON13 is not secreted during invasion. a.** Immunoblot on RH and  
21 ARO-YFP, RON11-YFP and RON13-YFP transgenic parasites showing proper expression  
22 of the fusion protein used in the topology assay. Actin (ACT) is used as a loading control.  
23 Image representative of three biologically independent experiments. **b.** Immunoblot showing  
24 the fusion of ToxoFilin and RON13 with the beta-lactamase protein (BLA). Anti-HA  
25 antibodies were to detected the fusion protein ToxoFilin-HA-BLA (ToxoF-BLA) and anti-  
26 myc antibodies were used to detect the fusion protein RON13-4myc-BLA (RON13-BLA).  
27 Image representative of three biologically independent experiments. **c.** ToxoF-BLA (green)  
28 and RON13-BLA (green) fusion proteins are properly targeted to the rhoptries as shown by  
29 IFA on intracellular parasites using anti-HA antibodies. Anti-HA antibodies were used to  
30 detect the fusion protein ToxoF-BLA and anti-myc antibodies to detect the fusion protein  
31 RON13-BLA. Scale bar = 2 $\mu$ m. Images representative of three biologically independent  
32 experiments. RON4 (magenta). DAPI (blue). **d and e.** Lactamase activity assessed on  
33 extracellular parasites demonstrating that the beta-lactamase is active when fused to  
34 ToxoFilin or RON13. The relative fluorescence of extracellular parasites incubated with the  
35 beta-lactamase substrate at 550nm (**d**) and 450nm (**e**) is shown for RH, ToxoF-BLA and  
36 RON13-BLA strains. This experiment was performed in triplicate. One ANOVA followed  
37 by Tukey's multiple comparison was used to test differences between groups (mean  $\pm$  SD;  
38 n=3 biologically independent experiments). **f.** Gating strategy for quantification of  
39 fluorescein<sup>+</sup> cell ( $\lambda$ =550nm; green gate) and coumarin<sup>+</sup> cell ( $\lambda$ =450nm; violet gate)  
40 frequency for uninfected cell monolayer, RH, RON13-BLA and ToxoFilin-BLA infected  
41 cell monolayer (yellow gate) analyzed by flow cytometry. The gating strategy for RON13-  
42 BLA and ToxoFilin-BLA is also shown in Figure 2c. The frequencies of fluorescein<sup>+</sup> cell

43 ( $\lambda=550\text{nm}$ ; green gate) and coumarin<sup>+</sup> cell ( $\lambda=450\text{nm}$ ; violet gate) were used to generate the  
44 graph shown in Figure 2d and 2e respectively. This experiment was performed in triplicate  
45 (n=3 biologically independent experiments). **g.** IFAs of extracellular parasites treated with  
46 cytochalasin D to block invasion but not rhoptry secretion. E-vacuoles are visualized with  
47 anti-ROP1 antibodies (magenta) and DAPI (blue) is used to stain DNA. Anti-Ty antibodies  
48 failed to detect RON13 (green) post-secretion. Scale bar = 5  $\mu\text{m}$ . Images representative of  
49 three biologically independent experiments. **h.** IFAs of e-vacuole rhoptry secretion assay on  
50 RON13-3Ty parasites. ROP1 (magenta) is detected in the e-vacuoles post-secretion using  
51 anti-ROP1 antibodies and RON4 (white) is detected as a dot post-secretion using anti RON4  
52 antibodies (arrow). RON13 (green) is not detected in the host cell post-secretion using anti-  
53 Ty antibodies. Scale bar = 2  $\mu\text{m}$ . Images representative of three biologically independent  
54 experiments. Source data are provided as a Source data file.

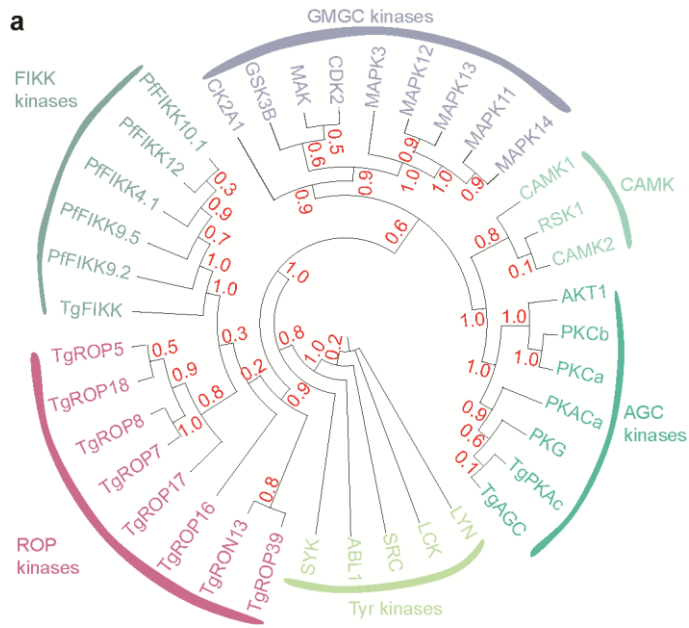

55

56

57

58

59

**Supplementary Figure 3. RON13 belongs to the ROPK clade.** Maximum-likelihood phylogenetic tree estimated from the multiple sequence alignment of the indicated kinases from different families (Supplementary Data 8). Bootstrap values are indicated in red.

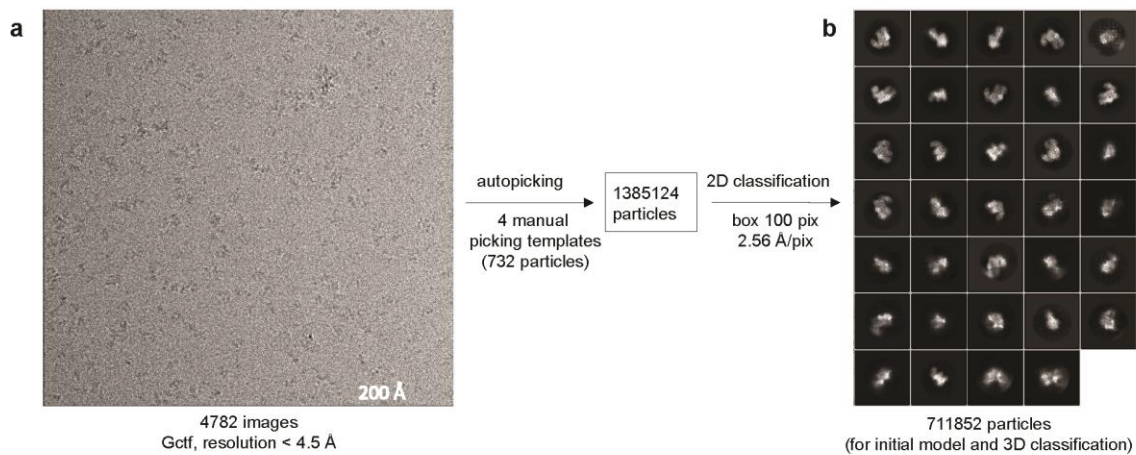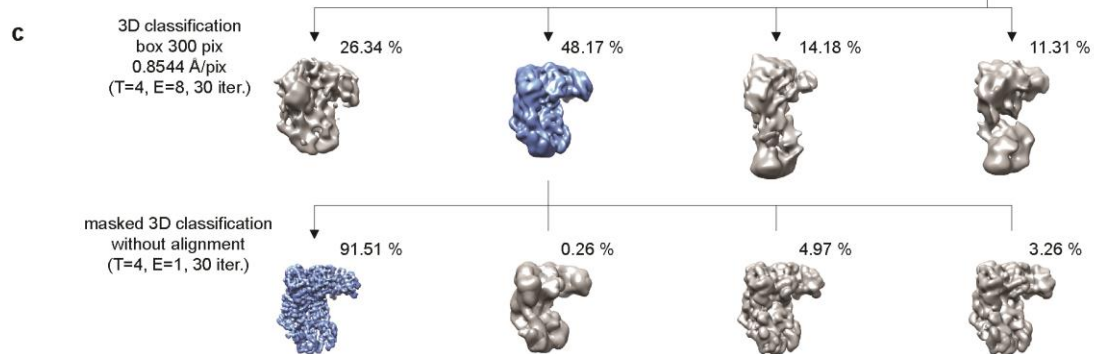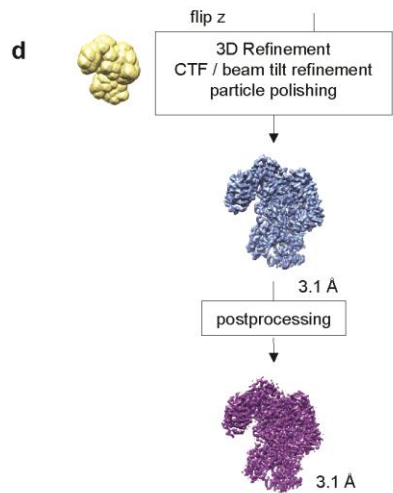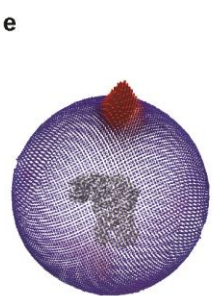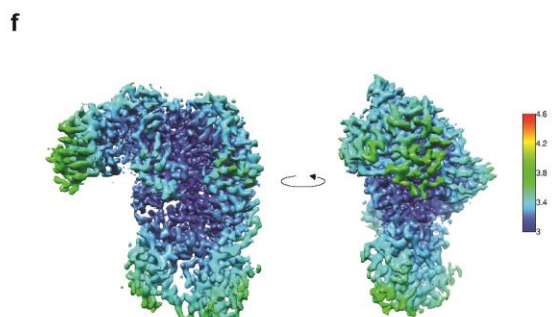

60

61



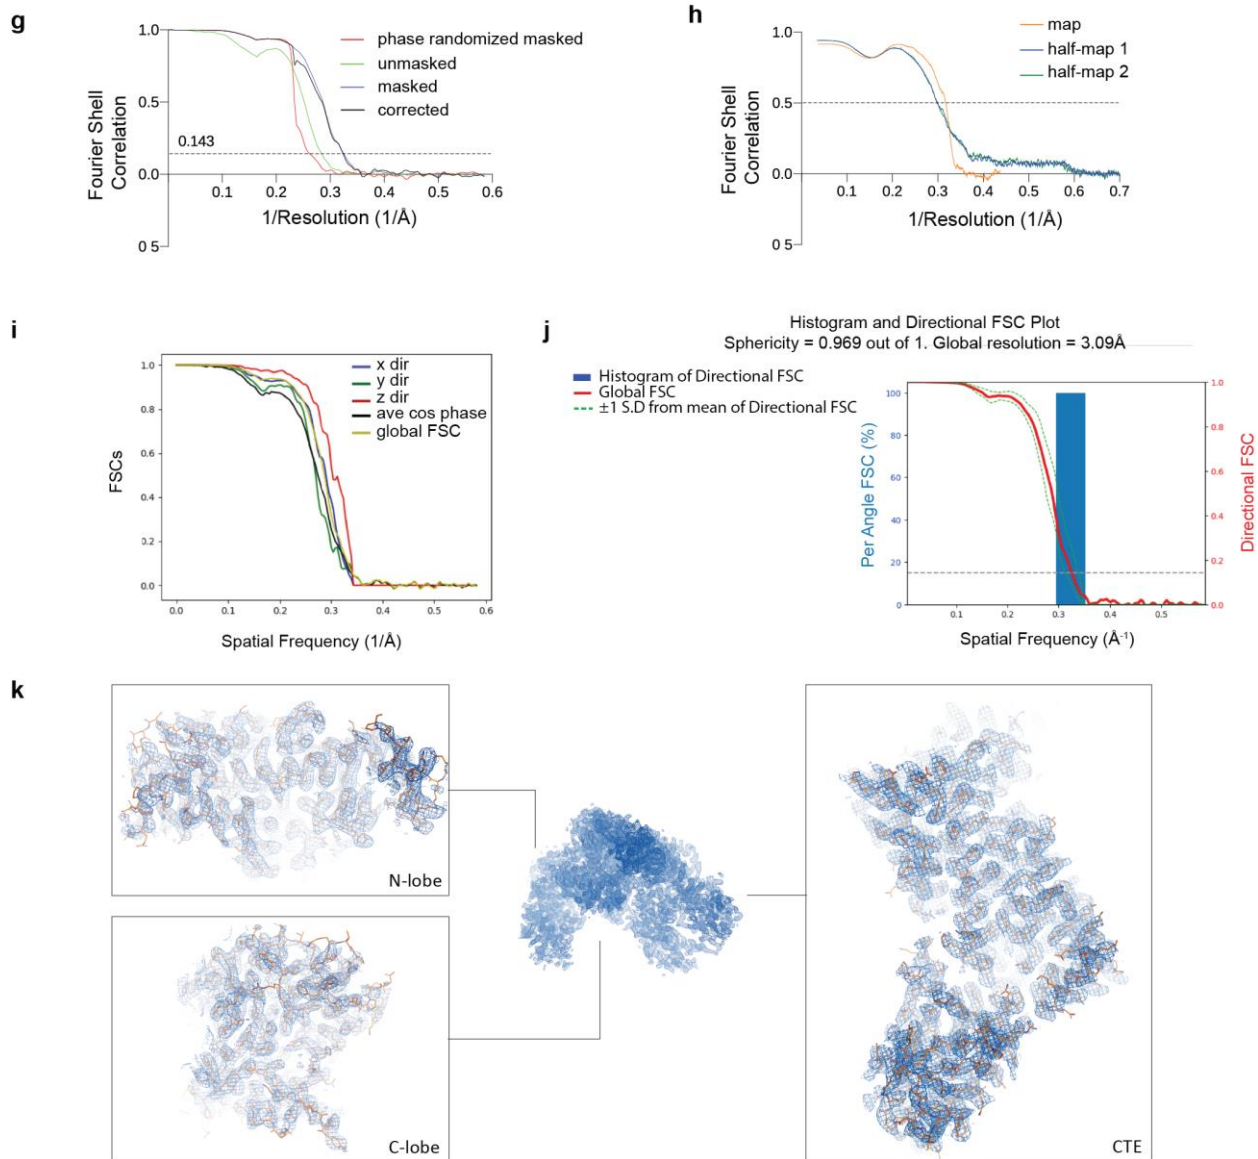

62

63 **Supplementary Fig. 4. Cryo-EM and single particle analysis of rRON13dk. a.** A

64 representative motion-corrected micrograph of rRON13dk (scale bar corresponds to 200 Å).

65 **b.** A selection of the best 2D classes (bottom; box edge corresponds to 256 Å). **c.** Several

66 rounds of 3D classification resulted in the final selection of particles for 3D refinement

67 (blue). **d.** The z-flipped 3D class and mask were used for 3D refinement, followed by CTF

68 refinement and Bayesian particle polishing, as described in “Methods”. The final

69 postprocessed density map at 3.1 Å resolution is shown in magenta. **e.** Angular distribution

70 histogram of the rRON13dk dataset used in the final refinement. **f.** Local resolution estimate  
71 for the refined density map, calculated in relion-3.0. **g.** Fourier shell correlation (FSC) plot  
72 for the 3D map shown in d, refined and postprocessed to a resolution of 3.1 Å (FSC 0.143).  
73 **h.** Model to map FSC curve. **i** and **j.** Output of the 3DFSC server, reporting the directional  
74 (**i**) and global FSC (**j**) of the cryo-EM reconstruction. The sphericity and global resolution  
75 are indicated in (**j**). **k.** The postprocessed density map of RON13-KD, contoured at  $8\sigma$ . The  
76 views of the map in boxes corresponding to the kinase N-lobe, C-lobe and CTD are  
77 overlaid with the model of the protein in stick representation.

78

79

80

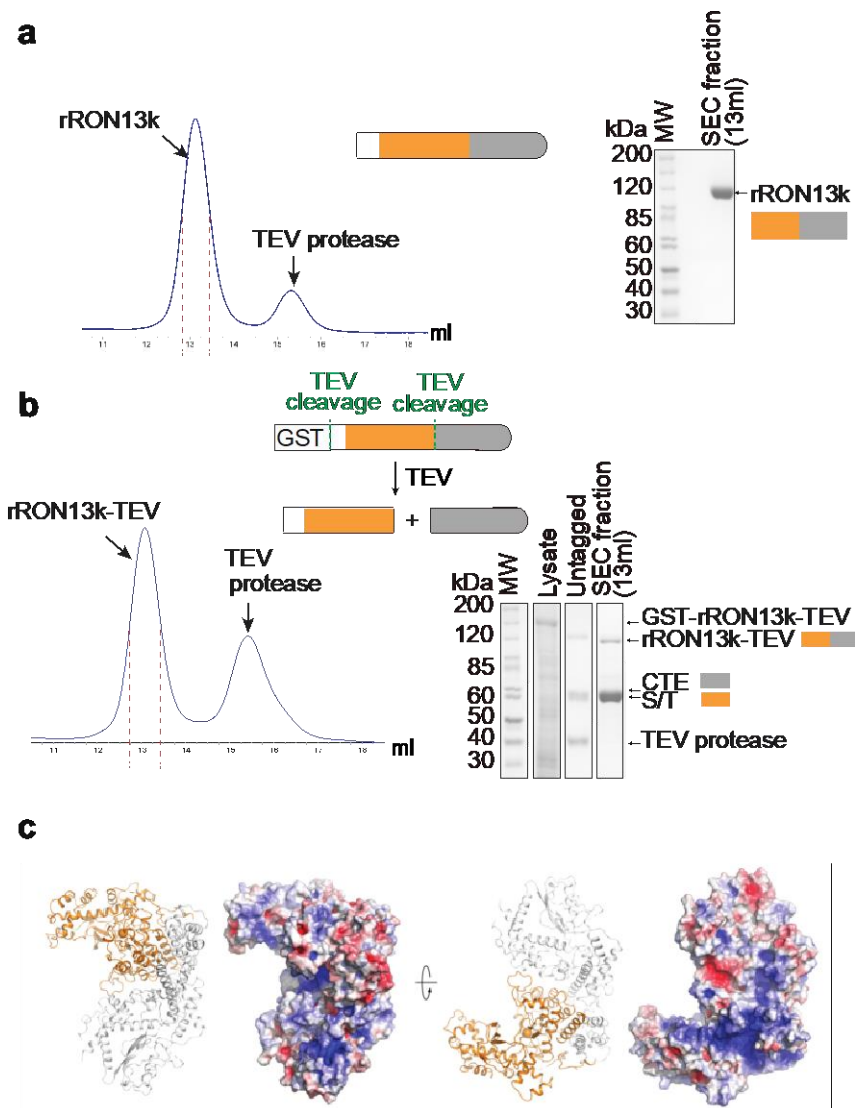

81

82 **Supplementary Figure 5. RON13 CTE is essential for its folding and stability. a and b.**

83 Size-exclusion chromatography elution profiles of rRON13k protein (a) and a RON13

84 protein composed of individual kinase domain (orange) + CTE fragment (grey) (rRON13k-

85 TEV) (b). The two fragments (kinase and CTE) were generated by cloning a TEV protease

86 recognition site between the two domains, yielding the two expected fragments after

87 purification and TEV proteolytic cleavage (SDS-PAGE analysis). Both rRON13wt and

88 rRON13k-TEV behave identically on a Superdex 200 size-exclusion column. c. Cartoon and

89 surface representation of RON13 from two opposite points of views; the sphere in the

90 cartoon representation indicates the position of the active site (residue 595). The protein  
91 surface is colored according to electrostatic potential, calculated using APBS (from red, -5  
92 kT/e, to blue, +5 kT/e). Source data are provided as a Source data file.

93

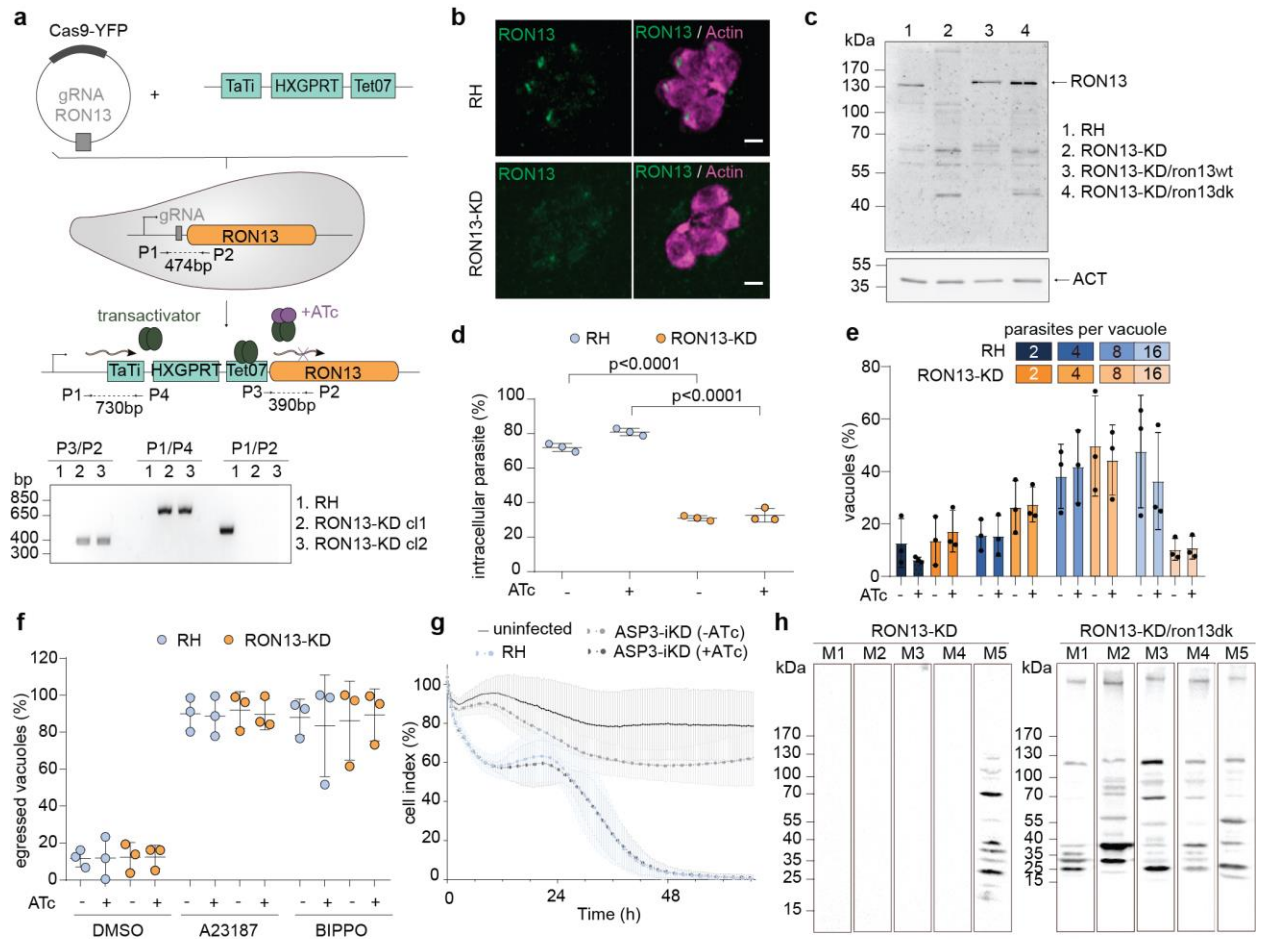

94

95

**Supplementary Fig. 6. RON13 is an important invasion and virulence factor. a.** Genetic

96

strategy used to generate RON13-KD and integration PCRs on the RON13-KD clonal lines

97

and RH parental line performed with primers P1/P4 (5' integration), P3/P2 (3' integration)

98

and P1/P2 to control the locus (wt = 474 bp; modified locus = 4429 bp). **b.** IFAs of

99

intracellular RH and RON13-KD parasites using anti-RON13 antibodies (green). An anti-

100

actin antibody (magenta) stained the parasite cytoplasm. Scale bar = 2µm. Images

101

representative of three biologically independent experiments. **c.** Western blot using anti-

102

RON13 antibodies showing the downregulation of RON13 in RON13-KD parasites

103

compared to the parental line RH or the complemented lines RON13-KD/ron13wt

104 (complemented wild-type) and RON13-DK/ron13dk (complemented dead kinase). Actin  
105 (anti-ACT) is used as a loading control. Image representative of three biologically  
106 independent experiments. **d.** Graph showing the percentage of intracellular parasites  
107 following 30 min of incubation with host cells reflecting the ability of extracellular parasites  
108 ( $\pm$ ATc) to invade. One ANOVA followed by Tukey's multiple comparison was used to test  
109 differences between groups (mean  $\pm$  SD; n=3 biologically independent experiments). **e.**  
110 Intracellular replication assay. Graph representing the number of parasite per vacuole  
111 observed at 36 h post-invasion. Two-way ANOVA followed by Tukey's multiple  
112 comparison was used to test differences between groups (mean  $\pm$  SD; n=3 biologically  
113 independent experiments). **f.** Induced egress assay. Graph representing the percentage of  
114 ruptured vacuoles following treatment with the egress inducers A23187 or BIPPO for RH  
115 and RON13-KD parasites ( $\pm$ ATc). Two-way ANOVA followed by Tukey's multiple  
116 comparison was used to test differences between groups (mean  $\pm$  SD; n=3 biologically  
117 independent experiments). **g.** Kinetic assay representing the cell index of HFF infected with  
118 different parasite strains (mean  $\pm$  SD; n=3 biologically independent experiments). **h.**  
119 Immunoblots showing the serology of infected mice at 84 days post-infection with RON13-  
120 KD and RON13-KD/ron13dk parasites (prior challenge). M1= mouse 1. Samples derive  
121 from the same experiment and gels were processed in parallel. The experiment was done  
122 once simultaneously with five mice for each strains tested (n=5 biologically independent  
123 animals). Source data are provided as a Source data file.

124

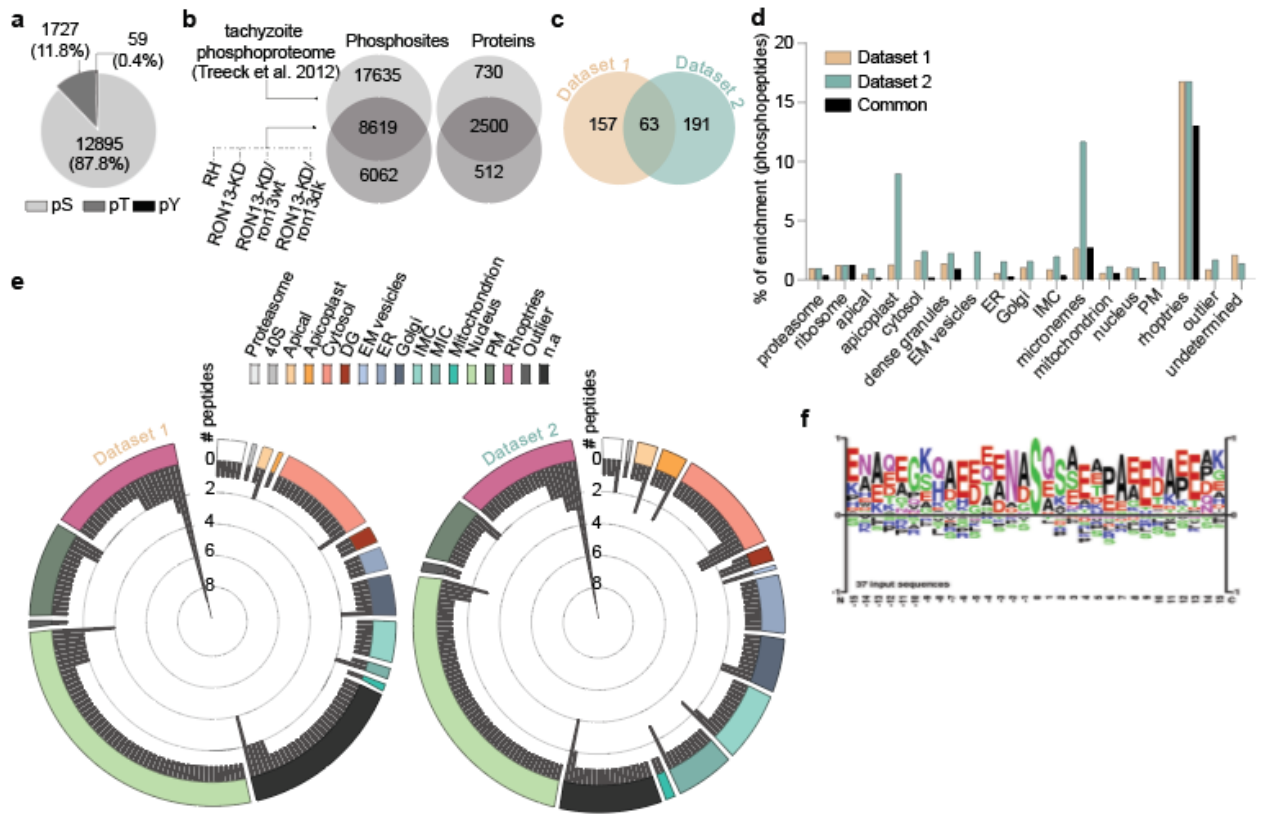

125  
 126 **Supplementary Fig. 7. Rhopty proteins are the major substrate of RON13.** **a.** Pie chart  
 127 showing the repartition of phospho-Ser (pS), phosphor-Thr (pT) and phosphor-Tyr (pY)  
 128 among the identified phosphopeptides in the total phosphoproteome. Phosphoproteome  
 129 analysis combined results obtained from four independent experiments. **b.** Venn diagrams  
 130 showing the overlapping data in terms of proteins and phosphosites between the already  
 131 published phosphoproteome [20] and the total phosphoproteome of this study. **c.** Venn  
 132 diagram of the phosphosites found in Dataset 1 and Dataset 2. **d.** Bar graph showing the  
 133 percentage of phosphopeptides for Datasets 1, Dataset 2 and common to both datasets  
 134 relative to the total number of phosphopeptides according to their predicted localization<sup>1</sup>. **e.**  
 135 Polar plots of the number of phosphopeptides found in Dataset 1 (left) and Dataset 2 (right)  
 136 binned by gene IDs and clustered according to their predicted subcellular localization<sup>1</sup>. **f.**

137 Sequence logo for phosphoserine of RON13 substrates (37 input sequences). Position 0  
138 indicates the serine that is phosphorylated. Source data are provided as a Source data file.



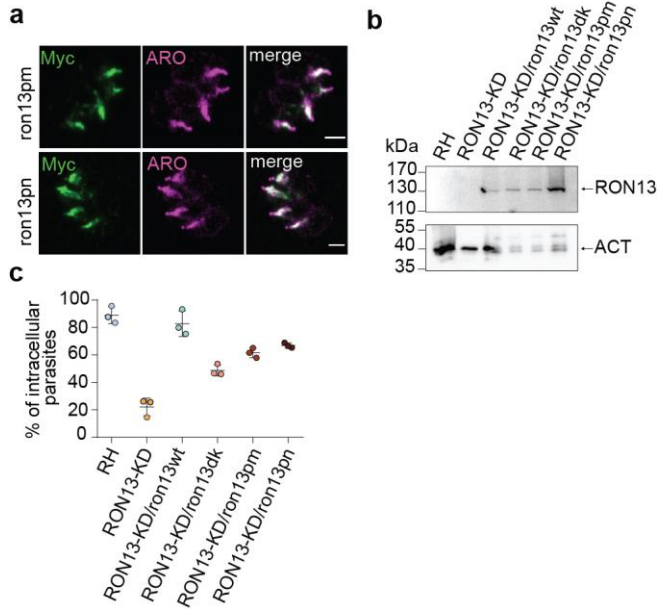

139

140

141

142

143

144

145

146

147

148

149

150

151

**Supplementary Fig. 8. Phosphorylation of RON13 slightly influence its function. a.** IFA on RON13-KD parasites expressing RON13 phospho-mimetic (ron13pm) or RON13 phospho-null (ron13pn) mutants. Anti-myc antibodies (green) were used to visualize the mutant copy of RON13 and anti-ARO antibodies (magenta) marked the rhoptries. Scale bar = 2 $\mu$ m. Images representative of three biologically independent experiments. **b.** Immunoblot of lysates from RON13-KD parasite complemented with either RON13pm or RON13pn. Anti-myc antibodies were used to visualize the mutant copy of RON13. Image representative of three biologically independent experiments. **c.** Invasion test showing the percentage of intracellular parasites reflecting their ability to invade. One-way ANOVA followed by Tukey's multiple comparison was used to test differences between groups (mean  $\pm$  SD; n=3 biologically independent experiments). Source data are provided as a Source data file.

a

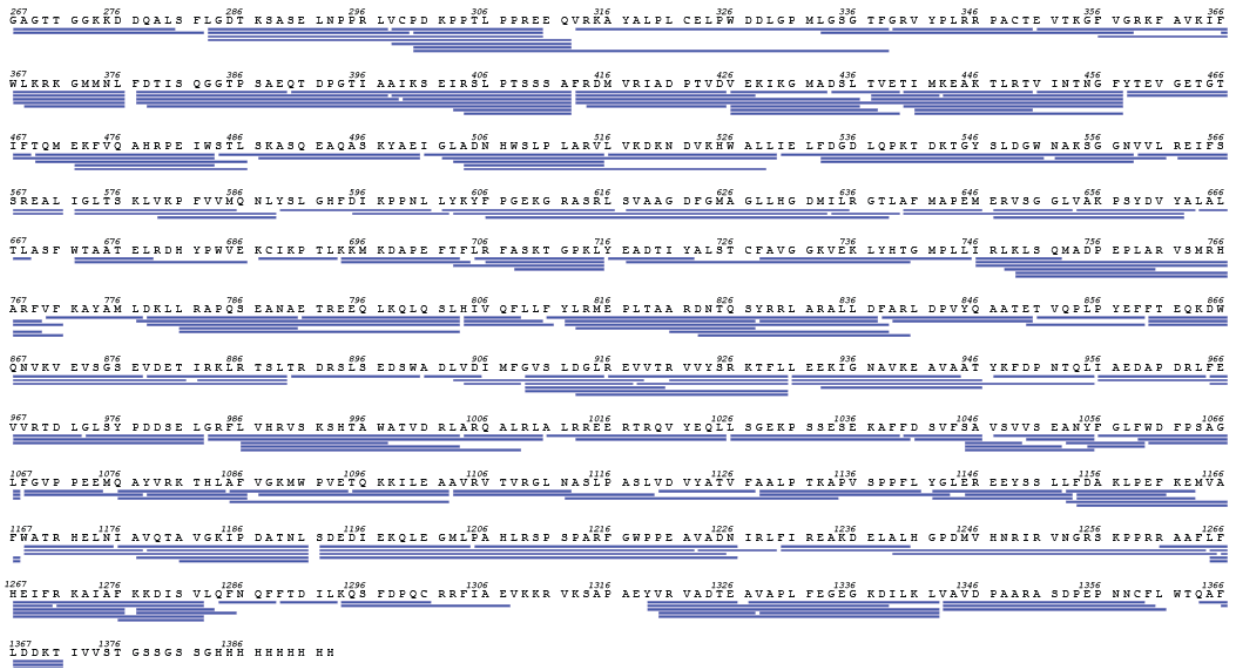

b

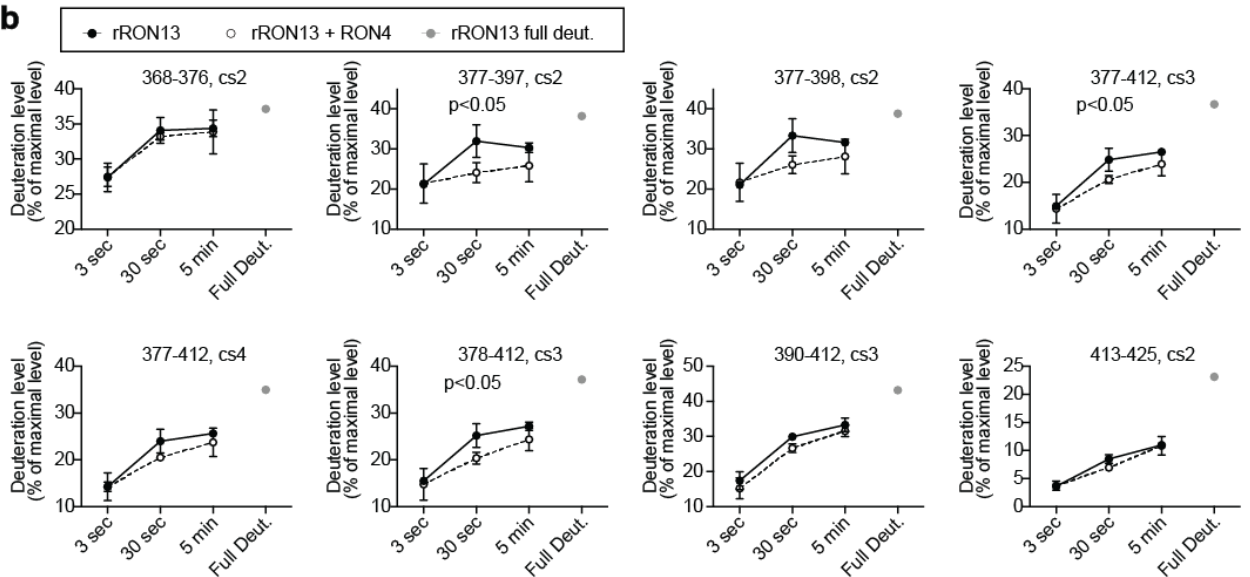

152

153

**Supplementary Fig. 9. HDX-MS analysis of RON4 interaction with rRON13dk. a.**

154

Peptide map showing the peptides selected for HDX-MS analysis **b.** Uptake plots of a

155

selection of peptides used in the HDX-MS analysis. cs: charge state. Indicated p values were

156

determined using a two-tailed paired t-test; n=3 biologically independent experiments.

157

Source data are provided in Supplementary Data 6.

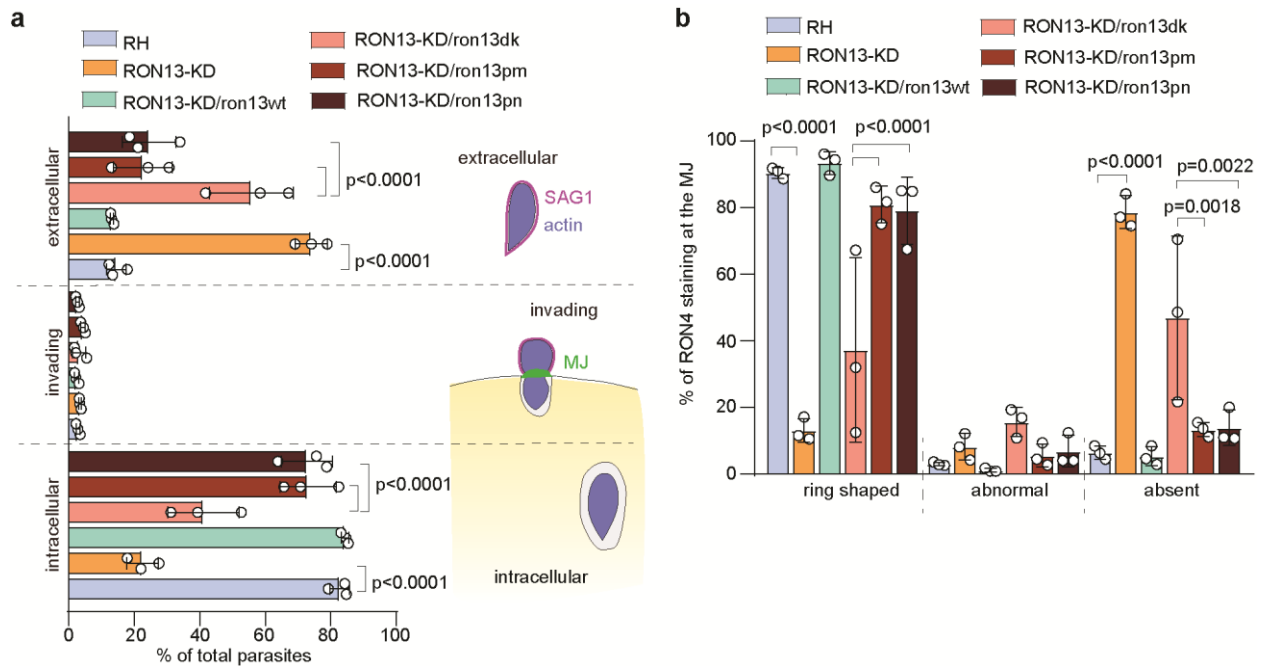

158

159

**Supplementary Fig. 10. RON13 auto phosphorylation does not impact MJ formation.**

160

**a.** Graph representing the proportion of extracellular, invading and intracellular parasites

161

observed in the pulse-invasion assay of RH, RON13-KD, RON13-KD/ron13t, RON13-

162

KD/ron13dk as well as the RON13-KD parasites expressing RON13 phospho-mimetic

163

(ron13pm) or RON13 phospho-null (ron13pn) mutants. A scheme representing the three

164

steps of the invasion processed is depicted. Two-way ANOVA followed by Tukey's multiple

165

comparison were used to test differences between groups in the panel of this figure (mean ±

166

SD; n=3 biologically independent experiments). **b.** Quantification of the different types of

167

RON4 staining (absent, abnormal, ring shaped) observed at the MJ of invading parasites.

168

Two-way ANOVA followed by Tukey's multiple comparison were used to test differences

169

between groups in the panel of this figure (mean ± SD; n=3 biologically independent

170

experiments). Source data are provided as a Source data file.

171

| <b>Data collection</b>                              |                                                 |
|-----------------------------------------------------|-------------------------------------------------|
| Instrument                                          | FEI Titan Krios / Gatan K2 Summit / Quantum GIF |
| Magnification                                       | 61425 (165kx)                                   |
| Voltage (kV)                                        | 300                                             |
| Electron exposure (e <sup>-</sup> /Å <sup>2</sup> ) | 47                                              |
| Defocus range (um)                                  | -0.6 to -2.4                                    |
| Pixel size (Å)                                      | 0.8544                                          |
| Resolution, Å (FSC 0.143)                           | 3.125                                           |
| Number of particles                                 | 320723                                          |
| <b>Model refinement</b>                             |                                                 |
| FSC 0.5 (masked), Å                                 | 3.15                                            |
| Map sharpening b-factor (Å)                         | -85.7                                           |
| Map CC (mask)                                       | 0.86                                            |
| Model composition                                   |                                                 |
| protein residues/ligands                            | 1044 / 0                                        |
| B factor min / max / mean (Å <sup>2</sup> )         | 19.84 / 110.98 / 49.14                          |
| Bond length RMSD (Å)                                | 0.007                                           |
| Bond angle RMSD (°)                                 | 0.756                                           |
| <b>Validation</b>                                   |                                                 |
| MolProbity score                                    | 1.76                                            |
| Clash score                                         | 5.20                                            |
| Rotamer outliers (%)                                | 0.11                                            |
| Ramachandran plot                                   |                                                 |
| Favored (%)                                         | 92.02                                           |
| Allowed (%)                                         | 7.68                                            |
| Disallowed (%)                                      | 0.29                                            |

172  
173  
174  
175  
176

**Supplementary Table 1. Cryo-EM data collection, single particle analysis and model building statistics.**

177 Infection 19.02.2020

178 Challenge 13.05.2020

179 End of the experiment 19.06.2020

180 Number of mice infected by each strain n =5 biologically independent animals

181

|                    | RH           |       | RON13-KD     |       | RON13-KD/ron13wt |       | RON13-KD/ron13dk |       |
|--------------------|--------------|-------|--------------|-------|------------------|-------|------------------|-------|
| days p.i           | n sacrifices | Date  | n sacrifices | Date  | n sacrifices     | Date  | n sacrifice      | Date  |
| 8                  | 1            | 27.02 |              |       | 1                | 27.02 |                  |       |
| 9                  | 1            | 28.02 |              |       | 3                | 28.02 |                  |       |
| 10                 | 3            | 29.02 |              |       | 1                | 29.02 |                  |       |
| Survived           | 84           | 0     | 5            |       | 0                |       | 5                |       |
| challenge          | 84           | n.a   | 5            |       | n.a              |       | 5                |       |
|                    | 93           |       | 2            | 22.05 |                  |       |                  |       |
|                    | 94           |       | 2            | 23.05 |                  |       |                  |       |
| end                | 121          |       | 1            | 19.06 |                  |       | 5                | 19.06 |
| Survived challenge |              | 0     | 1            |       | 0                |       | 5                |       |
| n seroconverted    |              | n.a   | 1            |       | n.a              |       | 5                |       |

182 **Supplementary Table 2. Virulence of RON13 mutant strains.** Table representing the  
183 number of CD1 mice infected with the specified parasite strains (top row), their survival and  
184 seroconversion to the infection (penultimate and ultimate rows respectively). At day 84 post-  
185 infection (p.i) surviving mice were challenged with RH parasites (turquoise row). The blue  
186 row indicates the number surviving the challenge infection. Abbreviations: n, number of  
187 biologically independent mouse; n.a, not applicable.

188

| <b>Dataset :</b>                                                 | <b>RON13</b>                                                                                                                | <b>RON13 + RON4</b>  | <b>RON13 FD</b> |
|------------------------------------------------------------------|-----------------------------------------------------------------------------------------------------------------------------|----------------------|-----------------|
| <b>Description :</b>                                             | <b>RON13</b>                                                                                                                | <b>RON13 + RON4</b>  | <b>RON13 FD</b> |
| <b>Reaction volume :</b>                                         | 50 ul                                                                                                                       | 50 ul                | 50 ul           |
| <b>% D2O in the reaction :</b>                                   | 81.0%                                                                                                                       | 81.0%                | 81.0%           |
| <b>temperature :</b>                                             | 22 °C                                                                                                                       | 22 °C                | 22 °C           |
| <b>D2O incubation times (sec) :</b>                              | 3 sec, 30 sec, 5 min                                                                                                        | 3 sec, 30 sec, 5 min | 90 min          |
| <b>Control sample :</b>                                          | Non-deuterated (ND) and fully deuterated (FD) RON13                                                                         |                      |                 |
| <b>Quench buffer :</b>                                           | 6 M Urea / 0.1 M NaH <sub>2</sub> PO <sub>4</sub> pH 2.4 / 1% Formic acid                                                   |                      |                 |
| <b>Quench buffer volume :</b>                                    | 20 ul                                                                                                                       | 20 ul                | 20 ul           |
| <b>Number of peptides analysed :</b>                             | 205                                                                                                                         | 205                  | 205             |
| <b>Sequence coverage :</b>                                       | 94.0%                                                                                                                       | 94.0%                | 94.0%           |
| <b>Replicates :</b>                                              | 3, 3, 3                                                                                                                     | 3, 3, 3              | 1               |
| <b>Standard deviation average (RON13, all time points, %D) :</b> | 1.03                                                                                                                        | 1.55                 | -               |
| <b>Criteria for HDX rate difference :</b>                        | Difference of HDX level at a given timepoint is > 5 % and > 1 Da and p values of two-tailed paired student t-test is < 0.05 |                      |                 |

189

**Supplementary Table 3. HDX-MS experimental details.**

190

191

192

| Protein | Gene ID      | MW (kDa) | RH/RON4-3Ty |           |             | RON13-KD/RON4-3Ty |           |             |
|---------|--------------|----------|-------------|-----------|-------------|-------------------|-----------|-------------|
|         |              |          | TSC IP      | TSC input | Enrichment  | TSC IP            | TSC input | Enrichment  |
| RON8    | TGGT1_306060 | 329      | 66          | 5         | 13.2        | 30                | 4         | 7.5         |
| RON2    | TGGT1_300100 | 166      | 82          | 16        | 5.125       | 67                | 3         | 22.33333333 |
| RON4    | TGGT1_229010 | 107      | 64          | 20        | 3.2         | 49                | 11        | 4.454545455 |
| RON5    | TGGT1_311470 | 187      | 82          | 26        | 3.153846154 | 78                | 25        | 3.12        |
| AMA1    | TGGT1_255260 | 63       | 26          | 15        | 1.733333333 | 26                | 17        | 1.529411765 |

193

194

195

196

197

198

199

200

**Supplementary Table 4. The MJ complex is form in absence of RON13.** Table depicting the MJ proteins identified by mass spectrometry in the co-immunoprecipitation of RON4 samples from RH and RON13-KD parasites. The table include information regarding the total spectrum count (TCS) in the input (total lysate) and in the IP samples as well as the ratio of enrichment for each of the proteins. Anti-Ty antibodies have been used to immunoprecipitate RON4.

| Primer # | Orientation | Sequence 3'->5'                                         | Construct                                   | Strain                          |
|----------|-------------|---------------------------------------------------------|---------------------------------------------|---------------------------------|
| 6765     | F           | GATGGGCCCTCACCGACATCCTCAAACAGAG                         | KI-3TY-DHFR                                 | ASP3-iKD/ron13-3Ty <sup>2</sup> |
| 6766     | R           | ACGCCTGCAGGGCTCACGACGATTGTTTTATCG                       | KI-3TY-DHFR                                 | ASP3-iKD/ron13-3Ty <sup>2</sup> |
| 4883     | R           | AACTTGACATCCCCATTTAC                                    | gRNA 5'ron13 locus                          | RON13-KD                        |
| 7012     | F           | GGAGTTCACAGGTTCTCTTGGTTTTAGAGCTAGAAATAGC                | gRNA 5'ron13 locus                          | RON13-KD                        |
| 7013     | F           | CCTCTATGTTTGTCTCTAGCAACGAATCGGCATGTTTGGGATCCGGGG        | PCR cassette TaTi-HXGPRT-TetO7S1            | RON13-KD                        |
| 7015     | R           | CACGCTTCGTTTCGCTTTGCATGCGAGGCAACATTTTGA TATCCCTAGGAATTC | PCR cassette TaTi-HXGPRT-TetO7S1            | RON13-KD                        |
| P1-7069  | F           | CTTAGGTCCTCGTTCGGTAG                                    | Check 5' integration RON13-KD               | -                               |
| P4-2903  | R           | GAGCGAGTTTCCTTGTGTCGTCAGGCC                             | Check 5' integration RON13-KD               | -                               |
| P3-1935  | F           | CGCTGCACCACTTCATTATTTCTTCTGG                            | Check 3' integration RON13-KD               | -                               |
| P2-7070  | R           | CTCTGCATTTCAGGTGCCTG                                    | Check 3' integration RON13-KD               | -                               |
| 8178     | F           | GTCTTCAGAGGCGCCTTAATGACAAAATGTTGCCTCGC                  | pRON5-ron13-4myc (part 1)                   | RON13-KD/ron13wt                |
| 7813     | R           | GCTTGATGATTTCTCCACCCACGGATAGT                           | pRON5-ron13-4myc (part 1)                   | RON13-KD/ron13wt                |
| 7814     | F           | GGTGGAGAAATGCATCAAGCCGACGCTGAAGA                        | pRON5-ron13-4myc (part 2)                   | RON13-KD/ron13wt                |
| 7815     | R           | CCAGACGATCCACGGTCGCCCAGGCAGT                            | pRON5-ron13-4myc (part 2)                   | RON13-KD/ron13wt                |
| 7816     | F           | GACCGTGGATCGTCTGGCGCGTCAG                               | pRON5-ron13-4myc (part 3)                   | RON13-KD/ron13wt                |
| 8179     | R           | GAGATGAGTTTTTGTTCGATGCTCACGACGATTGTTTTATC               | pRON5-ron13-4myc (part 3)                   | RON13-KD/ron13wt                |
| 8548     | F           | GGGTCACCTTTCGATCAAGCCGC                                 | pRON5-ron13dk-4myc                          | RON13-KD/ron13dk                |
| 8549     | R           | AAGCTGTAGAGGTTCTGC                                      | pRON5-ron13dk-4myc                          | RON13-KD/ron13dk                |
| 9757     | F           | CGCTGAACTCGACCCCGTGTACCAG                               | pRON5-ron13cte(R840E)-4myc                  | RON13-KD/ron13cte               |
| 9026     | F           | GGGCGCCggtaccACAGGAGGAAAGAAGGATGACCAAG                  | pFastBac-Melittin-GST-ron13 (271-1371)-His6 | Insect cell expression vector   |
| 9027     | R           | CCGAGGAaccggtGCTCACGACGATTGTTTTATCGTTCG                 | pFastBac-Melittin-GST-ron13 (271-1371)-His6 | Insect cell expression vector   |
| 9595     | F           | GAgAAttGTAcTTcCAaGCCGCGCGAGACAACACACAG                  | pFastBac-ron13 kinase domain-TEV-CTE        | Insect cell expression vector   |
| 9596     | R           | tTgAAgTACaaaTTcTCAGTGAGAGGCTCCATTTCGAAGATAAAAC          | pFastBac-ron13 kinase domain-TEV-CTE        | Insect cell expression vector   |
| 9758     | R           | GTCGAGTTCAGCGAAGTCGAGTAAAGCGC                           | pRON5-ron13cte(R840E)-4myc                  | RON13-KD/ron13cte               |
| 9759     | F           | GTCACGGCAGTCGTCTATTCGAGAAAAACGTTTTTG                    | pRON5-ron13cte(R921E)-4myc                  | RON13-KD/ron13cte               |
| 9760     | R           | GACGACTGCCGTGACGACCTCACGCAG                             | pRON5-ron13cte(R921E)-4myc                  | RON13-KD/ron13cte               |
| 9761     | F           | GTTACGAAGTTTCCGCAAGCCACACTGCCTGGGC                      | pRON5-ron13cte(R989E+K992A)-4myc            | RON13-KD/ron13cte               |



|       |   |                                                                 |                                                                                  |                                      |
|-------|---|-----------------------------------------------------------------|----------------------------------------------------------------------------------|--------------------------------------|
| 9762  | R | TGGCTTGC GGAAACTTCGTGAACCAAAAACCTCCCCAG                         | pRON5-RON13cte(R989E+K992A)-4myc                                                 | RON13-KD/ron13cte                    |
| 9590  | F | GCCATCGCCAGGGCGGAACAC                                           | pRON5-RON13pn(T379A+S381A)-4myc                                                  | RON13-KD/ron13pn                     |
| 9763  | F | ggtggatccggtggcGAgAAtttGTAcTTCaAGCCGCGC                         | pFastBac-RON13 kinase domain-linker-TEV-linker-CTE                               | Insect cell expression vector        |
| 9764  | R | gccaccggatccaccAGTGAGAGGCTCCATTCGAAGATAAAA<br>C                 | pFastBac-RON13 kinase domain-linker-TEV-linker-CTE                               | Insect cell expression vector        |
| 9765  | F | ggaagcggatccGCCGCGGAGACAACACACAG                                | pFastBac-RON13 kinase domain-linker-TEV-linker-CTE                               | Insect cell expression vector        |
| 9766  | R | ggatccaccgcttctTGgAAgTACaaaTTCgcccacg                           | pFastBac-RON13 kinase domain-linker-TEV-linker-CTE                               | Insect cell expression vector        |
| 9591  | R | GGCGATGGCGTCGAACAGATTTCATC                                      | pRON5-RON13pn(T379A+S381A)-4myc                                                  | RON13-KD/ron13pn                     |
| 9946  | F | GCCAGAGTTCGCC TTCCTGCGGT                                        | pRON5-RON13pn(T379A+S381A+T703A)-4myc                                            | RON13-KD/ron13pn                     |
| 9947  | R | GCGTCCTTCATCTTCTTCAGCG                                          | pRON5- RON13pn(T379A+S381A+T703A)-4Myc<br>pRON5- RON13pm(T379D+S381D+T703D)-4Myc | RON13-KD/ron13pn<br>RON13-KD/ron13pm |
| 9806  | F | GATATCGACCAGGGCGGAACAC                                          | pRON5-RON13pm(T379D+S381D)-4myc                                                  | RON13-KD/ron13pm                     |
| 9807  | R | GTCGATATCGTCGAACAGATTTCAT                                       | pRON5-RON13pm(T379D+S381D)-4myc                                                  | RON13-KD/ron13pm                     |
| 9948  | F | GCCAGAGTTCGACTTCCTGCGGT                                         | pRON5- RON13pm(T379D+S381D+T703D)-4Myc                                           | RON13-KD/ron13pm                     |
| 8263  | F | GCAAGGTTTCGTGCTGATCAGCGCTTCTTATCGTAGGG                          | pRON5-RON13-4myc-BLA                                                             | RON13-BLA                            |
| 8264  | R | ACCAGCGTTTCTGGGTGGGCCAGATCTTCTTCAGAAAT<br>AAGTTTTTG             | pRON5-RON13-4myc-BLA                                                             | RON13-BLA                            |
| 8798  | F | TACTTCCAATCCAATTTAATGCCCTGTCTCAGAGATGA<br>TTACGAC               | LIC-ARO-YFP                                                                      | ARO-YFP                              |
| 8799  | R | TCCTCCACTTCCAATTTTAGCCTCCGACAGCCGGACCA<br>AGA                   | LIC-ARO-YFP                                                                      | ARO-YFP                              |
| 8800  | F | TACTTCCAATCCAATTTAATGCTTGTGGAAGCAGAGAA<br>TTTGAGG               | LIC-RON11-YFP                                                                    | RON11-YFP                            |
| 8801  | R | TCCTCCACTTCCAATTTTAGCCACTCGCTCTCCAGGAAT<br>TGG                  | LIC-RON11-YFP                                                                    | RON11-YFP                            |
| 8802  | F | TACTTCCAATCCAATTTAATGCTTTCGTCCTTTTCTTGG<br>AGAAGATCCG           | LIC-RON13-YFP (part 1)                                                           | RON13-YFP                            |
| 8803  | R | GAAGGATATCGAATGCTTTCATGAAAAC                                    | LIC-RON13-YFP (part 1)                                                           | RON13-YFP                            |
| 8804  | F | CATTCGATATCCTTCGATTGCATGCAGT                                    | LIC-RON13-YFP (part 2)                                                           | RON13-YFP                            |
| 8805  | R | TCCTCCACTTCCAATTTTAGCGCTCACGACGATTGTTTT                         | LIC-RON13-YFP (part 2)                                                           | RON13-YFP                            |
| 10019 | F | GGATGAACTTCGACAAACTCGTTTTAGAGCTAGAAATA<br>GC                    | gRNA RON4 frame shift                                                            | RON4 KO                              |
| 10116 | F | gtaaatgggatgtcaagttGCAAAGTGGAGAGCATCATTGCgttta<br>gagctagaatagc | gRNA RON4 locus editing RON4pn and RON4pm                                        | RON4pn and RON4pm                    |

|       |   |                                                               |                                           |                   |
|-------|---|---------------------------------------------------------------|-------------------------------------------|-------------------|
| 10117 | R | gctattctagctctaaaacGAGTTTGTCGAAGTTCATCCaactgacatc<br>cccattta | gRNA RON4 locus editing RON4pn and RON4pm | RON4pn and RON4pm |
| 10094 | F | gctctcagGGATGTATCCGAACATG                                     | Sequencing RON4 frameshift                | RON4 KO           |
| 10097 | R | GCAACCGGTTCCCTCAGCACT                                         | Sequencing RON4 frameshift                | RON4 KO           |

**Supplementary Table 5. List of oligonucleotide primers and constructs used in this study.**

| Antibody                      | Reference                                                   | Dilution                        |        |
|-------------------------------|-------------------------------------------------------------|---------------------------------|--------|
|                               |                                                             | IFA                             | WB     |
| RON2 (rb)                     | 3<br>kind gift from Dr. M. Lebrun                           | 1/250 (U-ExM);<br>1/500 (IFA)   | 1/1000 |
| RON4 (rb)                     | 3<br>kind gift from Dr. M. Lebrun                           | 1/1500 (U-ExM);<br>1/3000 (IFA) | 1/1000 |
| RON4 (ms)<br>hybridoma T5 4H1 | 4<br>kind gift from Dr. JF. Dubremetz                       | 1/10                            | -      |
| RON5C (ms)                    | 5<br>kind gift from Dr. P. Bradley                          | 1/1000                          | 1/1000 |
| RON8 (rat)                    | 5<br>kind gift from Dr. M. Lebrun                           | 1/400                           | -      |
| RON9 (ms)<br>hybridoma        | 4<br>kind gift from Dr. JF. Dubremetz                       | 1/2.5 (U-ExM);<br>1/10 (IFA)    | -      |
| RON13 (rb)                    | this study                                                  | 1/1000                          | 1/500  |
| ROP2/3/4 (ms)<br>hybridoma    | 6<br>kind gift from Dr. JF. Dubremetz                       | 1/2.5 (U-ExM)                   |        |
| ROP1 (ms)<br>hybridoma        | kind gift from Dr. JF. Dubremetz                            | 1/10                            | -      |
| ARO (rb)                      | 7                                                           | 1/1000                          | -      |
| GAP45 (rb)                    | 8                                                           | 1/10000                         | -      |
| SAG1 (ms)<br>hybridoma T4 1E5 | 9                                                           | 1/10                            | -      |
| SAG1 (ascite)                 | 10                                                          | 1/3000                          | -      |
| Actin (ms)<br>hybridoma       | 11                                                          | 1/10                            | 1/10   |
| Catalase (rb)                 | 12                                                          | -                               | 1/2000 |
| $\alpha + \beta$ tubulin (gp) | 13                                                          | 1/250 (U-ExM)                   |        |
| Phospho-STAT6<br>(rb)         | Cell signalling (9361)                                      | 1/400                           | -      |
| Myc (ms)<br>hybridoma 9E10    | from DSHB by Bishop, J.M. (DSHB Hybridoma<br>Product 9E 10) | 1/10                            | 1/10   |
| Myc (rb)                      | Sigma (3956)                                                | 1/1000                          | -      |
| Ty (ms)<br>hybridoma BB2      | 14                                                          | 1/2.5 (U-ExM);<br>1/10 (IFA)    | 1/10   |
| Ty (rb)                       | kind gift from Dr. CJ. Tonkin <sup>15</sup>                 | 1/1000 (U-ExM)                  | -      |
| GFP (ms)                      | Roche                                                       | 1/2000                          | 1/1000 |
| MIC2 (ms)                     | kind gift from Dr. V. Carruthers                            | -                               | 1/10   |
| GRA1 (rb)                     | Anawa                                                       | -                               | 1/3000 |
| HA (rat)                      | Roche (clone 3F10)                                          | 1/1000                          |        |
| HA (ms)<br>hybridoma          | Clone 12CA5                                                 |                                 | 1/10   |

**Supplementary Table 6. List of antibodies used in this study.** The species in which the antibodies were produced are mentioned between parentheses. Rabbit (rb); mouse (ms) ; guinea pig (gp).

## Supplementary references

1. Barylyuk, K. *et al.* A Comprehensive Subcellular Atlas of the Toxoplasma Proteome via hyperLOPIT Provides Spatial Context for Protein Functions. *Cell Host Microbe* **28**, 752-766.e9 (2020).
2. Dogga, S. K. *et al.* A druggable secretory protein maturase of Toxoplasma essential for invasion and egress. *Elife* **6**, 1–35 (2017).
3. Besteiro, S., Dubremetz, J. F. & Lebrun, M. The moving junction of apicomplexan parasites: A key structure for invasion. *Cell. Microbiol.* **13**, 797–805 (2011).
4. Leriche, M. A. & Dubremetz, J. F. Characterization of the protein contents of rhoptries and dense granules of Toxoplasma gondii tachyzoites by subcellular fractionation and monoclonal antibodies. *Mol. Biochem. Parasitol.* **45**, 249–259 (1991).
5. Straub, K. W., Cheng, S. J., Sohn, C. S. & Bradley, P. J. Novel components of the Apicomplexan moving junction reveal conserved and coccidia-restricted elements. *cell Microbiol.* **11**, 590–603 (2009).
6. Sadak, A., Taghy, Z., Fortier, B. & Dubremetz, J. Characterization of a family of rhoptry proteins of Toxoplasma gondii. *Mol. Biochem. Parasitol.* **29**, 203–211 (1988).
7. Mueller, C. *et al.* The toxoplasma protein ARO mediates the apical positioning of rhoptry organelles, a prerequisite for host cell invasion. *Cell Host Microbe* **13**, 289–301 (2013).
8. Frenal, K., Polonais, V., Marq, J., Stratmann, R. & Limenitakis, J. Functional Dissection of the Apicomplexan Glideosome Molecular Architecture. *Cell Host Microbe* 343–357 (2010) doi:10.1016/j.chom.2010.09.002.
9. Couvreur, G., Sadak, A., Fortier, B. & Dubremetz, J. F. Surface antigens of Toxoplasma gondii. *Parasites and Vectors* **97**, 1–10 (1988).
10. Kim, K., Soldati, D. & Boothroyd, J. Gene replacement in Toxoplasma gondii with chloramphenicol acetyltransferase as selectable marker. *Science (80- )*. **262**, 911–914 (1993).
11. Herm-gotz, A. *et al.* Toxoplasma gondii myosin A and its light chain : a fast , single-headed , plus-end-directed motor. *EMBO J.* **21**, 2149–2158 (2002).
12. Ding, M., Clayton, C., Soldati, D., Biologie, M. & Feld, I. N. Toxoplasma gondii catalase : are there peroxisomes in Toxoplasma ? *J. Cell Sci.* **2419**, 2409–2419 (2000).
13. Tosetti, N. *et al.* Essential function of the alveolin network in the subpellicular microtubules and conoid assembly in Toxoplasma gondii. *Elife* **9**, 1–22 (2020).
14. Bastin, P., Bagherzadeh, A., Matthews, K. R. & Gull, K. A novel epitope tag system to study protein targeting and organelle biogenesis in Trypanosoma brucei. *Mol. Biochem. Parasitol.* **77**, (1996).
15. Uboldi, A. D. *et al.* Regulation of Starch Stores by a Ca<sup>2+</sup>-Dependent Protein Kinase Is Essential for Viable Cyst Development in Toxoplasma gondii. *Cell Host Microbe* **18**, 670–681 (2015).
