# Supplementary material for: Structural insights into an atypical secretory pathway kinase crucial for Toxoplasma gondii invasion
Source: PubMed Central journal article supplement (PMC8213820; doi:10.1038/s41467-021-24083-y), 2021-06-18
Supplement: 41467_2021_24083_MOESM4_ESM.pdf [file 41467_2021_24083_MOESM4_ESM.pdf]

TgRON13/1-1375

TgRON13/1-1375
HHA\_321650/1-1376
NCLIV\_004270/1-1118
SN3\_00900895/1-1424
BESB\_024160/1-1353
CSUI\_007316/1-481
ETH\_00018465/1-1314
cyc\_03129/1-1343

TgRON13/1-1375

87 LFFV...SPREVDALKFRGNGGRHLNAELDGNWAKR...FQETQRAAPPDSFFVSDSEISGRSLSLSLA...
88 LFFL...SPREVDALKFRGNGGRHLNAELDGNWAKH...FQETQRTSPDPSFFVSDSEVSGRTSLSLSLA...
70 LLLL...TPVANAIAIKF.GVHRRHLHAEPEGNWNTQ...YKRRRARAPVDSFSDSRVA.RSNLNLPA...
67 LLLC...VPELTECLGP.PTLRFHRHTRAARKWKTGADGRQERGATGISSLLEQPVFKPRLRPSQTFRFLSPDVS...
1 MALYPGAATATRGRPCVGAARRQQ...QREQRQNFCCPCQ...RQ...SLLRFALC
8 LFASDRTTGRNTGAVKL.QLGRAVLQQKMSVSLYAWHDHRRQRRCMERQQ...PCIFPRCL...RVNLKTCAAAVLGITCC

TgRON13/1-1375

150 .....SSEQGT.....STVDSRFVGLSGQKPRHIWGSQEETGERREDRQEESEGR...GNEDAYHPHTFSSHSSSSMPFYGFALFD
151 .....SPEQGT.....STVDSRFVGLSRKKKPRHWGSEETDERRDERREESGELR.GNEDADHPHTFSSHSSSSMPFYGFALFD
130 .....DSEQAASSSLAAADAHAIEAGLVALSRTQSRGLWKEVSAEVPETDTGDS...RG.SDEETERPDSQSPSSSLPFASLR.R
140 .....LQGEASSLFAIPDRNVKHFQVLSLKLQIA...RERLAETPGEIRRPVHSDLQNDGRVESVHTPPF...
50 VVCILCFCRSKGSISP...AAAAA.TEISVGFPSL.KTYERLRFISSHRVLSLSD...NQISLQRNAEKQKEVG...
82 LLCTIGFPAAALVAHRGLSKSSFA.GVDTRGAQRV.RSFLRFRAVSPHASQLF...LQLPLEEGHNEEF...P...

TgRON13/1-1375

222 SSSAFPFFSAAVSSPPFSMTVSPADRVIQALPIAFAEHKS GGEEKASREETGGKKDDQALSFLGDTKSASELNPPRLVCPD...KPPTLPPREEQ
223 SSSTFPPFSAAVSSPPFSVTVSPADRLIQALPIAFAEHKS GGEEKASREETGGKTDDKALSFLGDPKSAASELNPPRLVCPD...TPPTLPPREEQ
207 SSSVSPASSSSSLVFSFPNPARPSDWLHMHAVPAFTEKQKGGVPSGDGTGKADDDALAFGLSAASAASELNPPRLVLRPT...SSPSLPSREEQ
1 1 .....MREKLHSAFDFLQOKK.REPOQTAGPPLPRLSLPFLVPSLPPSASLNPPRLVLYAV...HSPASTREREQ
203 .....APSSPLVSSP.....SSDSVPLAPSAFAQTQKKEFASPGK...TSETKNALAFGLVAVSERNNPPRLVLRPT...SASAPSTQEE
ETH\_00018465/1-1314
cyc\_03129/1-1343
114 .....NDPANSMIWPVSLVQ...QRH.VLAET...LQEIIMKAF...TPLLQHLPGRLKLGSTEEAAEAAASLPEREQ
147 .....FESSQGV...VLLQ...KST.SATGD...GHASATVVF...SSLRLRLLPGRLLHVAQQP...PSASEG

TgRON13/1-1375

313 VRKAYALPLCELPWDDLGPMGLGSGTFGRVYVLR.....RPACTEVTKGFVGRKFAVKIFWLLKRRGMMNLFDTTSQGG
314 VRKAYALPLCELPWDDLGPMGLGSGTFGRVYVLR.....RPACTEVTKGFVGRKFAVKIFWLLKRRGMMNLFDTTSQGG
314 VRKAYALPLCELPWDDLGPMGLGSGTFGRVYVLR.....QPACTAVTKDFVGRKFAVKIFWLLKRRGLINLFETIDDEGA
64 ATAAALS LPVCTLHMDLGLKLGAGSYGKVFVAVRVEGAAQPQ.....QAGEEYRPAEILSQFSEKNFAAKIFRLLKKNVMDIFDKLDAGS
279 LAKANS LPVCELPWDDLGPMGLGSGSYGVYVLL.....QPACPDVTKSFVGRKFAVKIFWLLKRRAGIMAHFDSISDGK
ETH\_00018465/1-1314
cyc\_03129/1-1343
176 LSLVASLPICILSADNLERTVGSGSFGKVFVLSRHAVERGSGREIVAGSSAFEPPTNTAANPHEEAVMQKYGVKIFVYQED...PII.HAAMGG
198 LSLSMASLCRSLFDDLPKLGSGTYGVYVLMRAGALSGGPCIPTAAQAEAGAKGAA.....QTDDPGKFAVKIFVRLRGLV.GLM.KAAEBG

Kinase Domain (n-lobe)

TgRON13/1-1375

385 TPSAEQTDPTGTTAAIKSEIRSLPTSSSAFRDMVR..IADPTVDVE.KIKGMADS LTVETINKEAKTLRTVINTNGFYTEVGEFGTITFOMEKFFVQ
386 TPSAEQTDPTGTTAAIKSEIRSLPTSSSAFRDMVR..IADPTVDVE.KVKGLGDTLTVETINKEAKTLRTVINTNCFYTEVGEFGTITFOMEKFFVQ
370 KPSEAEHTDPTGTTAAIKSEIRSLPTSSSAFRDMIR..LADPKLDLE.QIKAFGES LTVETINKEAKTLRTVINTNCFYTEVGEFGTITFOMEKFFIK
149 LKEKRRITGAVLSFISSELRKAAPTSGSEVFWLVH..TANPAVRPA.VLRNLINNVYANVYANYKLVRSLLNSASFYSSELQKGTGSIKSMOFTFK
351 AP...QTDPTETLHAIESQIRAIIPANSNIYQKMLV..VIDPSIDAQ.KTKNYAGSLTHDIVLTVETINKEAKTLRTVINTNCFYTEVGEFGTITFOMEKFFIK
1 1 .....MIISOLEHFFA
268 FOH...PAEKIKSIQTYLRSIIDLDRFLCSALQELGSESSVAQLQRLQRELSG.AEFAANSRIAEAAINTQLYVDDLKLLGTLHRTTLAAIQ
283 QKELRAPELQALKKAASELKVNLKDPFTVSALKEVLEDPGMLGTLEALQOQSLSPFAFLQNFAAIRSAIYTKCFLELEETGLTITIQMORALE

N-lobe insertion

TgRON13/1-1375

477 AHRFEIWSITLSKASQEAQASKYAEIGLADNHWLSPFLARVLDKKNVDKHWALDIELFDGDLQPKTDKKTG..YSDDGNWAKS.....GGNV
478 THRFEIWSITLSKASQEAQASKYAEIGLADNHWLSPFLARVLDKKNVDKHWALDIELFDGDLQPKTDKKTG..FSDDGNWAKS.....GGNV
462 AHRASVITLSKASQEAQASKYAEIGLADNHWLSPFLARVLDKKNVDKHWALDIELFDGDLQPKVDKKTG..YADGNWAKA.....AGNV
241 THEPNVWASFCQSSEEAIAASKLVETAFANNDWNLVVARILAKDRYDNLHWGLDIELFDGDMQPEVERLQ..LEADGWKRTT.....KNS
440 RNRDDVWTALEGAASEEAKASKYAEIGLADNHWLSPFLARVLDKKNVDKHWGLDIELFDGDMQPEVERLQ..LEADGWKRTT.....KNS
12 TFRFDVWASLKGATKEARASKYAEIGLADNHWLSPFLARVLDKKNVDKHWGLDIELFDGDMQPKGDKTG..LADGWDRQS.....SGNR
358 TLSFASYSLEDPAPARDKVLAAVQEQ.IGWGLPVGRVLRVSDGRLWGLDIELFDGDLDISIRPTLDGFRPDWSEPTKMTATRAIVWERKLL
378 KLDPEAMWEMKMKASKERVSLFATVGRYVHWLSPFLARVLDKKNVDKHWGLDIELFDGDLQPKANRNSDGSIDGWAVGE.....RNA

Kinase Domain (n-lobe)

TgRON13/1-1375

560 VLREIFSSREAELGLTSKLVKPFVVMQNLVSLGHFDIKPNNLLYKYFPGEKGRASRLSVAAGDFGMAGLLHGMILRGLTAFNAPEMERVSGG..
561 VLREIFSSREAELGLTSKLVKPFVVMQNLVSLGHFDIKPNNLLYKYFPGEKGRAGRLSVAAGDFGMAGLLHGMILRGLTAFNAPEMERVSGG..
545 PLREIFSSREAELGLTSKLVKPFVVMQNLVSLGHFDIKPNNLLYKYFPAANGRPARLSVAAGDFGMAGLLHGMILRGLTAFNAPEMERVSGG..
323 KLVLYNSVPMVKLADKAVRPFMLLHLLYGMGHFDVVKPANNLHFHOP..NCSERGEALRVVAAADFGLAGLQFKATPIKGLSLPFAPEMERVSGG..
523 ALREIFGSRSTLSLTSKLVKPFVVMQNLVSLGHFDIKPNNLLYKYFPAQNGRPARLSVAAGDFGMAGLLHGMILRGLTAFNAPEMERVSGG..
95 NLRKIFGSRSTLSLTSKLVKPFVVMQNLVSLGHFDIKPNNLLYKYFPAEKGRASRLSVAAGDFGMATLLFQETKIRGLTAFNAPEMERVSGG..
492 CSHNLASDKYSLSLSAKIVAFVVMQNLVSLGHFDIKPNNLFFKKNH.....TVKIAVTFDFGMVAFNRKVLGRGLTAFNAPEMERVSGG..
462 VLKREIFAEKSSLSLSSKRAIQPFVVMQNLVSLGHFDIKPNNLFFKKNH.....TVKIAVTFDFGMATLLGQNVLMRGLTAFNAPEMERVSGG..

TgRON13/1-1375

653 .....LVAKPSYDVAALTLASFWTAATE.LRDHYPVVVEKCKIPTEKMKM
654 .....LVAKPSYDVAALTLASFWTAATE.LRDHYPVVVEKCKIPTEKMKM
638 .....LVARPSFDVAALTLASFWTAATE.LRNHLPPVVEKCKIPTEK...
416 AARIQTSSALEVAQHRLLLQQRGVYVEQHPYTSFTSISSSAEGYATATGASPAVDVFAALGLTLAFAFFTAGRAPQKQKQVVEKCKIPTEK...
616 .....LTSSEPFDVAALGLTLAFAFFTAGRAPQKQKQVVEKCKIPTEK...
190 PQKK.....LVLLASPAFDVAALGLTLAFAFFTAGRAPQKQKQVVEKCKIPTEK...
540 SSQHDPSRRLQPRGKRLFTAS.....KKNKPIPLFRLLPSSHDAFVAALGLTLAFAFFTAGRAPQKQKQVVEKCKIPTEK...
538 .....PPPRIVALPEHDVFAALGLTLAFAFFTAGRAPQKQKQVVEKCKIPTEK...

Kinase Domain (c-lobe)



*TgRON13/1-1375*

1208 LRS P S P A R F G W P P E A V . A D N I R L F I R E A K D E . L A L H G P D M V H N R I R V N G R S K P P R R A A F L F H E I F R K A I A F K K D I S V L Q F N Q F T D I L K . . . . .  
 HHA\_321650/1-1376 1209 LRS P S P A R F G W P P E A L . A D N I R L F I R E A K E E . L A L H G P D M V H D R I R V N G R S K P P R R A A F L F H E I F R K P I A F K K D I S V L Q F N Q F T D I L K . . . . .  
 NCLIV\_004270/1-1118  
 SN3\_00900895/1-1424 1259 A L E T T S F R Y G W E P H Q L K . A R . Q Q M V Q E E F D . F V R E T L P L V R T T I R T N G V A R S S Q S E N S R I F R I L T K T F F L Y P D T T V G E V N R E F T R L L R . . . . .  
 BESE\_024160/1-1353 1180 I R I A P P A R F G W K E Q A N I R T S I L D F V K D V R R R . R S L A G P D M V Q V R I R I N G K S K P P R D A S L V L H E I R K K L V A F K S G V S V S Q F N E F T R V L K . . . . .  
 CSUI\_007316/1-481  
 ETH\_00018465/1-1314 1136 I . . L A W Q R Y A P E E T T A L . R V I R E V V E K E I D I I N T P K R S G L I S F W I S T N G P F V R S K E T N S R A G I L V M K Q I Q M Y P K T T A A H F N R H F T E V L R S . . . . .  
 cyc\_03129/1-1343 1160 M . . R A P E R F G L T E Q I G E . G V L E G V L T E A L Y N A R K P E V E G L T T L S V S V N G A F L R S P K T N R Q I G R P A V K H L K L P P E A T A G Y V N E H F T N I L A T S L C P P

**C-terminal extension**

*TgRON13/1-1375*

1295 . . . . . Q S F D P Q C R R F I A E V K K R V K S A P A E Y V R V A D T E A V A P L F E G E G K D I L K L V A V D P A A R A S D P E P N N C F L W T Q A F L D D K T I V V S . . . . .  
 HHA\_321650/1-1376 1296 . . . . . Q S F D P Q C R R F I A E V K K R V K D A P A E Y V R V A E T E A V A P L F E G D G K D I L K L V A V D P A A R A S D P E P N N C F L W T Q A F L D E K T I V V G . . . . .  
 NCLIV\_004270/1-1118  
 SN3\_00900895/1-1424 1345 . . . . . R S Y N V R C Q T Y V A S L R R L V E G P E P S Y E P V L P Y Y K A A P L L E T R G G R K F K L V A T P V D . P T P A F P I R N C F L W T R E F L Q D R G I V M S . . . . .  
 BESE\_024160/1-1353 1268 . . . . . E S F N P F C R S F V A E L K K R I K R S P A E Y E T V S G D T A V T L L G Q D G S S I F K L V A V D P S V Q G S A S E P N N C F I W T P A F L A D E K I I V I E A A D A  
 CSUI\_007316/1-481  
 ETH\_00018465/1-1314 1223 . . . . . S S L A P G C E R Y S A I L K R Q E A . . D G T F T P V D P T E Q L . . L G G D E Q K D K F R L F A V P P E T G S N R R L L N N C F L W T A P F L S P D P F V V P A P G P A  
 cyc\_03129/1-1343 1252 V W V L L R S I R S S L A P G C S R Y K A I L K R K M A . . S G K Y E A L E N T E I L . . Q G G E G Q R D R L R L Y A V P P A T G T N A R T P N N C F L W T A B I L R P E S Y T V L P A A P S

*TgRON13/1-1375*

TgRON13/1-1375  
 HHA\_321650/1-1376  
 NCLIV\_004270/1-1118  
 SN3\_00900895/1-1424  
 BESE\_024160/1-1353  
 CSUI\_007316/1-481  
 ETH\_00018465/1-1314 1305 A D Q V V I D M P Y  
 cyc\_03129/1-1343 1343 P . . . . .
