# Supplementary material for: Structural insights into an atypical secretory pathway kinase crucial for Toxoplasma gondii invasion
Source: PubMed Central journal article supplement (PMC8213820; doi:10.1038/s41467-021-24083-y), 2021-06-18
Supplement: 41467_2021_24083_MOESM9_ESM.pdf [file 41467_2021_24083_MOESM9_ESM.pdf]

TgRON13/1-1375

TgRON13/1-1375
HHA 321650/1-1376
NCLIV 004270/1-1118
SN3 00900895/1-1424
BESB 024160/1-1353
CSUI 007316/1-481
ETH 00018465/1-1314
cyc 03129/1-1343
PF3D7\_1321100/1-3447 MNFFLFFRNIFLLNTIIFILNQYIKRKYDYSRFFIFSLKIKSSKEEFTKNVHRKATNTKEDKSAYKNEKKEIPYRNNNKRKDKNKKGNDNKKILEKGLK

TgRON13/1-1375

TgRON13/1-1375
HHA 321650/1-1376
NCLIV 004270/1-1118
SN3 00900895/1-1424
BESB 024160/1-1353
CSUI 007316/1-481
ETH 00018465/1-1314
cyc 03129/1-1343
PF3D7\_1321100/1-3447 DTNSNIKSSTSSNTISNVSSKLSDNSNISNTFTNIKIQLKDKHNKNSDIKNVSTDKKKENDNNKNNNNKNNKKIPIIYIPFNDIKNSPYIRGKLK

TgRON13/1-1375

TgRON13/1-1375
HHA 321650/1-1376
NCLIV 004270/1-1118
SN3 00900895/1-1424
BESB 024160/1-1353
CSUI 007316/1-481
ETH 00018465/1-1314
cyc 03129/1-1343
PF3D7\_1321100/1-3447 LVVYKSFYBECQKELYBAKQFFKNNKIYISTFAVVVKNLTSENIDQTEKQVWVADMKILQKNSYINISVTCNDSHEKQIQDISFTFKQEKBEFELMRKSLKN

TgRON13/1-1375

TgRON13/1-1375
HHA 321650/1-1376
NCLIV 004270/1-1118
SN3 00900895/1-1424
BESB 024160/1-1353
CSUI 007316/1-481
ETH 00018465/1-1314
cyc 03129/1-1343
PF3D7\_1321100/1-3447 VVNIYDHFLYNIDTFYNKRKYLEYINFFFRNPHIKSNMMDIKKNISSNITIQKDNILLKRLGSPNKKYILFRMRQNNRIMCMVLTDPKRLNRFIL

TgRON13/1-1375

TgRON13/1-1375
HHA 321650/1-1376
NCLIV 004270/1-1118
SN3 00900895/1-1424
BESB 024160/1-1353
CSUI 007316/1-481
ETH 00018465/1-1314
cyc 03129/1-1343
PF3D7\_1321100/1-3447 YNMLRDHII EKEGFKDVIIFETDDNNIYNYDSKLSKDIRILSNKFEPFELMDEHAYINKPYEYFYLKYPVHFLQNKGIINYNINFSWLCHEFINNS

TgRON13/1-1375

TgRON13/1-1375
HHA 321650/1-1376
NCLIV 004270/1-1118
SN3 00900895/1-1424
BESB 024160/1-1353
CSUI 007316/1-481
ETH 00018465/1-1314
cyc 03129/1-1343
PF3D7\_1321100/1-3447 QYKYYPHFYLSKHSKNDMGIRNISFYQKEDAYTFIENKKNINKNDKCKTYDTCCKDDTYRTDKKSKLKNINRIYNTKYALSCKKNRNHNKNEINNI

TgRON13/1-1375

TgRON13/1-1375
HHA 321650/1-1376
NCLIV 004270/1-1118
SN3 00900895/1-1424
BESB 024160/1-1353
CSUI 007316/1-481
ETH 00018465/1-1314
cyc 03129/1-1343
PF3D7\_1321100/1-3447 CSHKKEEKHMFNNYINISYNNMKYINKHNKPFLELKEKLSDNNEREDKDKKDESFEKNETHLMNDDNNIGDDEFNSEVNNDDNNGSYESNFFYDMINE

TgRON13/1-1375

TgRON13/1-1375
HHA 321650/1-1376
NCLIV 004270/1-1118
SN3 00900895/1-1424
BESB 024160/1-1353
CSUI 007316/1-481
ETH 00018465/1-1314
cyc 03129/1-1343
PF3D7\_1321100/1-3447 ISNKIENS DSYLNEEDIYWD DDFPDTNEYIDDTSTITSTN NNNIRTDQNGDNKKDDSNKDIISIQKVDNSTEVNESNKIDDTKKGESYTLN NIKGYI

TgRON13/1-1375

TgRON13/1-1375
HHA 321650/1-1376
NCLIV 004270/1-1118
SN3 00900895/1-1424
BESB 024160/1-1353
CSUI 007316/1-481
ETH 00018465/1-1314
cyc 03129/1-1343
PF3D7\_1321100/1-3447

MLPRMQSERS . VARQ . SLGAT . . . . . RSRC
MSPRMLQRS . VARQ . SLAAT . . . . . RSPC
TKFKDFIQNKSESYVTTKNKSIDDKSSDDQISDDKINDDKSSVDQISDDKINDDKSSVDQISDDKSSDDIKLNEEQTSGDQNDLSDNNENNQETITSD

TgRON13/1-1375

TgRON13/1-1375
HHA 321650/1-1376
NCLIV 004270/1-1118
SN3 00900895/1-1424
BESB 024160/1-1353
CSUI 007316/1-481
ETH 00018465/1-1314
cyc 03129/1-1343
PF3D7\_1321100/1-3447

LLRFATKKWASRGLGSSNRPGRP . . . . . PPSSAAGHRASC . P . . . . . FPRSSFSASALRFLCPVLCSSLATLFFV . . . . . REV
PLRSAEKKWATRGLGSSNPPWRL . . . . . PPSAAGRWAPHPG . . . . . FLPRSSFSASLTLRFLPPVLCSSLATLFFL . . . . . SP . . . . . REV
MERLTTGGPHSAGP . PRL . . . . . PFSSSPSTPLSVSSFSAVHASRSLSSWRLLWRLRAICHRCSLLVSVLLFVLLVCVP . . . . . ELT
MVLPLFVLFASDR . . . . . TTG
TKFKDFIQNKSENYMTTKDKTSE

TgRON13/1-1375

TgRON13/1-1375
HHA 321650/1-1376
NCLIV 004270/1-1118
SN3 00900895/1-1424
BESB 024160/1-1353
CSUI 007316/1-481
ETH 00018465/1-1314
cyc 03129/1-1343
PF3D7\_1321100/1-3447

A . . . . . LKFRGN . GGR . HLNAE . LD . . . . . GNW . . . . . AKRFQETQRAA . PPDSFFV
A . . . . . LKFRGN . GGR . HLNAE . LD . . . . . GNW . . . . . AKHFQETQRTS . PPDSFFV
CLGPPTLRFHRHTRAAR . KWKTG . AD . . . . . GRQERG . . . . . ATGISSLLEQPVRKPRRLR . PSQTFFR
MAYLPGAAT . . . . . ATRGRP . . . . . CVGARROQ . . . . . QREQRQN . FCCPCP .
TNGAVKLQGRAVLQKQMVSLYAWHDD . . . . . RRQRRG . . . . . CME . . . . . RQO . PC . IFF .
DKINDDKSSDDKINDDKISDDKISDDKISDDIKLNEEQTSGDQNDLYDNNKDKKEETISSDDEKGLDLSNMGDSDEKLDKDDMKNEHENLSAENVPS

TgRON13/1-1375

TgRON13/1-1375
HHA 321650/1-1376
NCLIV 004270/1-1118
SN3 00900895/1-1424
BESB 024160/1-1353
CSUI 007316/1-481
ETH 00018465/1-1314
cyc 03129/1-1343
PF3D7\_1321100/1-3447

ASSEQGTSTVDSRFVLSGQKPRHIWGSQE . ETGERREDRQEESEGRGNE . . . . . DAYHPHTF . . . . . SH
ASPEQGTSTVDSRFVLSRKKPRHVGAAEQ . ETDERRDERRESEGLRGNE . . . . . DADHPHTF . . . . . SH
FAALCVVCIL . CFCRSKG . S . . . . . ISPAAAA . . . . . TEIS . . . . . VGFPSLK . . . . . TYERLRF . . . . . IS
VAHRLSKSSF . A . . . . . GVDT . . . . . RGAQRV . . . . . SFLRFRA . . . . . VS
NYMTTKDKNSDKISDDKSSDDIKLDE . KQAGDQNDLYDNNKDKKEETISSDDEKGLDLSNMGDSDEKLDKDDMKNEHENLSAENVPS

TgRON13/1-1375

TgRON13/1-1375
HHA 321650/1-1376
NCLIV 004270/1-1118
SN3 00900895/1-1424
BESB 024160/1-1353
CSUI 007316/1-481
ETH 00018465/1-1314
cyc 03129/1-1343
PF3D7\_1321100/1-3447

SSSMPFYGALFD . . . . . SSSAFPFFSAAVSSPFFSMTVSPADRVIQALPIAFAEHKSGGEEKASREETGKKDDQ . ALSFLGDTKSASELN . PPRLV . . . . .
SSSMPFYGAPFD . . . . . SSSTFPFFSAAVSSPFFSVTVSPADRVIQALPIAFAEHKSGGEEKASREETGKKDDQ . ALSFLGDPKKSASELN . PPRLV . . . . .
MREKLLHSDFFDLQKKREPO . QTAGPPLRLS . LFFLVPSP . PPRLV . . . . .
S . . . . . LVQQRH . VLA . . . . . ETLQEI . MKAFT . . . . . PLLQHL . PGR . LK . . . . .
V . . . . . LLQKST . SAT . . . . . GDGHASAT . VFS . . . . . SLLRRL . PGR . LH . . . . .
ENVPDSENTINDKT . . . . . KEGSTTLTK . AMGYITKFKDFIKKSENYMTTK

Subdomain I

TgRON13/1-1375

TgRON13/1-1375
HHA 321650/1-1376
NCLIV 004270/1-1118
SN3 00900895/1-1424
BESB 024160/1-1353
CSUI 007316/1-481
ETH 00018465/1-1314
cyc 03129/1-1343
PF3D7\_1321100/1-3447

VRKAYALPLCELPWDDLGPM . LGS . . . . .
VRKAYALPLCELPWDDLGPM . LGA . . . . .
VRKAYALPLCELPWDDLGPM . LGA . . . . .
VRKAYALPLCELPWDDLGPM . LGS . . . . .
LQSTEEAEAAASLPERLSLVA . SPICLSADN . LERTV . GSGSFGKVLISRHAVEEGSCREIV .
PSASEGLSLMSM . LCRSLFDD . LDPKLG . GGTYGEVYPMRAGALS . GPCIP . TA . . . . .
GQNDLYDNNKYKEEIISSDDEKGLDLSNMGDSDEKLDKSN . . . . . MSDNEEKL . . . . . DVNHVKNSEEGNL

Subdomain I

Kinase Domain (n-lobe)

Subdomain II

TgRON13/1-1375

TgRON13/1-1375
HHA 321650/1-1376
NCLIV 004270/1-1118
SN3 00900895/1-1424
BESB 024160/1-1353
CSUI 007316/1-481
ETH 00018465/1-1314
cyc 03129/1-1343
PF3D7\_1321100/1-3447

GRVYPLRRPACTEVTKGFVGRKF . AVKIFW . LKRRKGMNLFDTISQGGT . PSAEQ . TDPGT . ITAA . TKSEIRSLPTSSS
GRVYPLRRPACTEVTKGFVGRKF . AVKIFW . LKRRKGMNLFDTISQGGT . PSAEQ . TDPGT . ITAA . TKSEIRSLPTSSS
GRVYPLKQPACTAVTKDFVGRKF . AVKIFW . LKRRKGLINL . FETIDEGAKPSA . EHTDPDT . ITAA . TKSEIRSLPISSP
EYR . PCAEILS . QFSEK . NFA . AKIFR . LK . NVMDIF . DKLDAGSL . KEK . RITGAVL . SFIS . SE . LK . A . IPTGSE
GSGVYPLLPQACPDVTKSFVGRKF . AVKIFR . LK . RAGIMAH . FDSIS . DGKAP . . . . . Q . TD . TET . LHA . IE . SQ . I . R . A . IPASNS
AGSSAFEP . EPTNTAAN . PHEEA . VMQY . V . G . VKIF . S . VTQED . . . . . PIIHA . AMGGFQH . . . . . PAEKL . K . ST . Q . TY . LRS . IDLDDR
AQAE . GAKGAA . . . . . QTDDP . GP . KF . AVKIFR . LRGLV . GLMKA . A . E . EGQ . KELRA . PELQAL . LKKA . SE . LK . SV . NLKDP
AENVPSDENT . . . . . INDKTEG . STLTK . TAMGYITKFKDFIQNKSENYMTTKDKTSEDKINDDKSSD . D . . . . . KINDDKISDD

Kinase Domain (n-lobe)

TgRON13/1-1375

TgRON13/1-1375
HHA 321650/1-1376
NCLIV 004270/1-1118
SN3 00900895/1-1424
BESB 024160/1-1353
CSUI 007316/1-481
ETH 00018465/1-1314
cyc 03129/1-1343
PF3D7\_1321100/1-3447

AFR . . . . . D . MVR . IAD . PTV . DVEK
AFR . . . . . D . MVR . IAD . PTV . DVEK
SFQDIKFGVHDRHLHAEPEGNWNTYKRRR . ARAPVDSFSDSRVARNLNL . PV . ADSEQA . ASSSLAAADA . AHIEAGLVALSR . TQSRM . IRLADPKLDLEQ
VFW . . . . . ELVHTAN . PAVR . PAV . . . . . KMVVR . IDPS . IDA . QK
IYQ . . . . . K . MVR . IAD . PTV . DVEK
FLCSAL . . . . . EA . L . G . S . S . VAQ
FTVSAL . . . . . K . EV . L . E . D . P . G . M . LGT
KISDDKISD . DIKLN . EE . Q . TSGDQNDLYSDANKEKEKIFSDGTFLEKGNL . DKS . NMS . D . SEG . . . . . KLDGNHMKNNEDGNLSAENVSSDEK . K . IYDKSKDDIF

N-lobe insertion

TgRON13/1-1375  
α5  
430 440 450 460 470 480  
TgRON13/1-1375  
HHA 321650/1-1376  
NCLIV 004270/1-1118  
SN3 00900895/1-1424  
BESB 024160/1-1353  
CSUI 007316/1-481  
ETH 00018465/1-1314  
cyc 03129/1-1343  
PF3D7\_1321100/1-3447

N-lobe insertion

Kinase Domain (n-lobe)

TgRON13/1-1375  
α7 490 α8  
TgRON13/1-1375  
HHA 321650/1-1376  
NCLIV 004270/1-1118  
SN3 00900895/1-1424  
BESB 024160/1-1353  
CSUI 007316/1-481  
ETH 00018465/1-1314  
cyc 03129/1-1343  
PF3D7\_1321100/1-3447

Kinase Domain (n-lobe)

TgRON13/1-1375  
β5 TT β6  
500 510 520 530  
TgRON13/1-1375  
HHA 321650/1-1376  
NCLIV 004270/1-1118  
SN3 00900895/1-1424  
BESB 024160/1-1353  
CSUI 007316/1-481  
ETH 00018465/1-1314  
cyc 03129/1-1343  
PF3D7\_1321100/1-3447

Kinase Domain (n-lobe)

TgRON13/1-1375  
540  
TgRON13/1-1375  
HHA 321650/1-1376  
NCLIV 004270/1-1118  
SN3 00900895/1-1424  
BESB 024160/1-1353  
CSUI 007316/1-481  
ETH 00018465/1-1314  
cyc 03129/1-1343  
PF3D7\_1321100/1-3447

Kinase Domain (c-lobe)

TgRON13/1-1375  
550 α9 α10  
560 570  
TgRON13/1-1375  
HHA 321650/1-1376  
NCLIV 004270/1-1118  
SN3 00900895/1-1424  
BESB 024160/1-1353  
CSUI 007316/1-481  
ETH 00018465/1-1314  
cyc 03129/1-1343  
PF3D7\_1321100/1-3447

Kinase Domain (c-lobe)

TgRON13/1-1375  
α11 HRD catalytic motif β7 β8 DGF motif TT η2 η3 T  
580 590 600 610 620 630 640 650  
TgRON13/1-1375  
HHA 321650/1-1376  
NCLIV 004270/1-1118  
SN3 00900895/1-1424  
BESB 024160/1-1353  
CSUI 007316/1-481  
ETH 00018465/1-1314  
cyc 03129/1-1343  
PF3D7\_1321100/1-3447

Kinase Domain (c-lobe)

TgRON13/1-1375  
TT α12 α13 α14  
660 670 680 690  
TgRON13/1-1375  
HHA 321650/1-1376  
NCLIV 004270/1-1118  
SN3 00900895/1-1424  
BESB 024160/1-1353  
CSUI 007316/1-481  
ETH 00018465/1-1314  
cyc 03129/1-1343  
PF3D7\_1321100/1-3447

Kinase Domain (c-lobe)

TgRON13/1-1375  
α15 α16 α17 TT α18 α19  
700 710 720 730 740 750 760 770 780 790  
TgRON13/1-1375  
HHA 321650/1-1376  
NCLIV 004270/1-1118  
SN3 00900895/1-1424  
BESB 024160/1-1353  
CSUI 007316/1-481  
ETH 00018465/1-1314  
cyc 03129/1-1343  
PF3D7\_1321100/1-3447

Kinase Domain (c-lobe)

TgRON13/1-1375

TgRON13/1-1375
HHA\_321650/1-1376
NCLIV\_004270/1-1118
SN3\_00900895/1-1424
BESB\_024160/1-1353
CSUI\_007316/1-481
ETH\_00018465/1-1314
cyc\_03129/1-1343
PF3D7\_1321100/1-3447

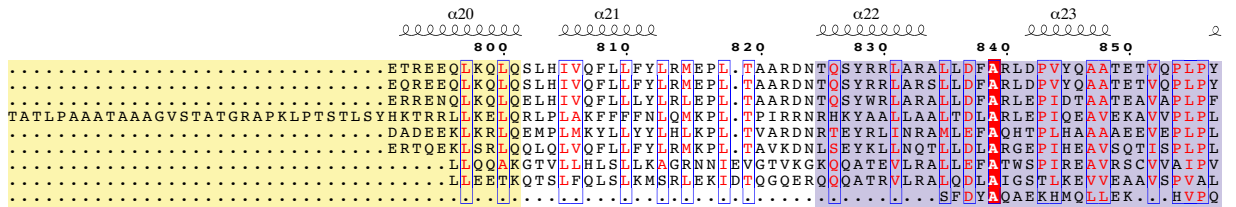

TgRON13/1-1375

TgRON13/1-1375
HHA\_321650/1-1376
NCLIV\_004270/1-1118
SN3\_00900895/1-1424
BESB\_024160/1-1353
CSUI\_007316/1-481
ETH\_00018465/1-1314
cyc\_03129/1-1343
PF3D7\_1321100/1-3447

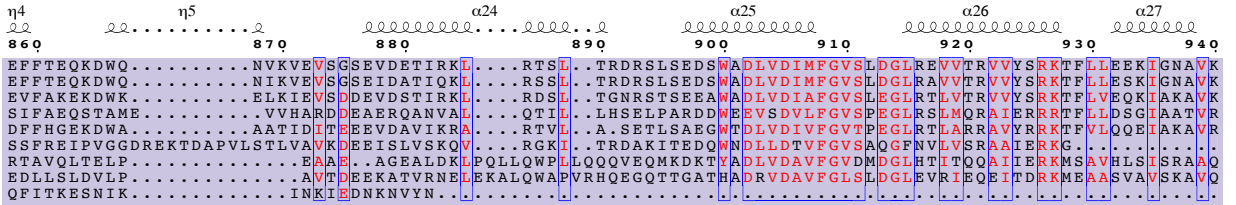

C-terminal extension

TgRON13/1-1375

TgRON13/1-1375
HHA\_321650/1-1376
NCLIV\_004270/1-1118
SN3\_00900895/1-1424
BESB\_024160/1-1353
CSUI\_007316/1-481
ETH\_00018465/1-1314
cyc\_03129/1-1343
PF3D7\_1321100/1-3447

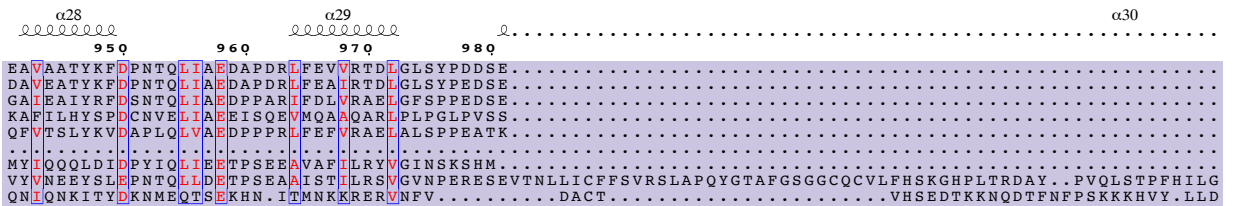

C-terminal extension

TgRON13/1-1375

TgRON13/1-1375
HHA\_321650/1-1376
NCLIV\_004270/1-1118
SN3\_00900895/1-1424
BESB\_024160/1-1353
CSUI\_007316/1-481
ETH\_00018465/1-1314
cyc\_03129/1-1343
PF3D7\_1321100/1-3447

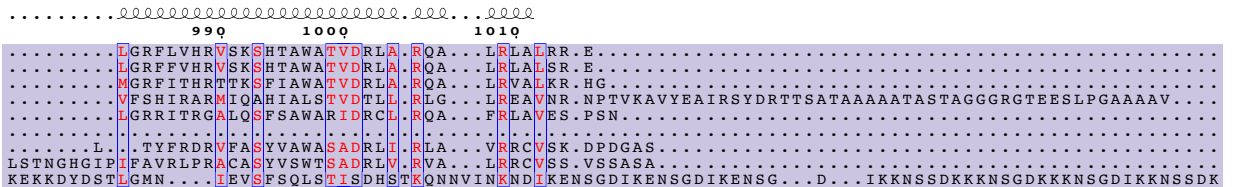

C-terminal extension

TgRON13/1-1375

TgRON13/1-1375
HHA\_321650/1-1376
NCLIV\_004270/1-1118
SN3\_00900895/1-1424
BESB\_024160/1-1353
CSUI\_007316/1-481
ETH\_00018465/1-1314
cyc\_03129/1-1343
PF3D7\_1321100/1-3447

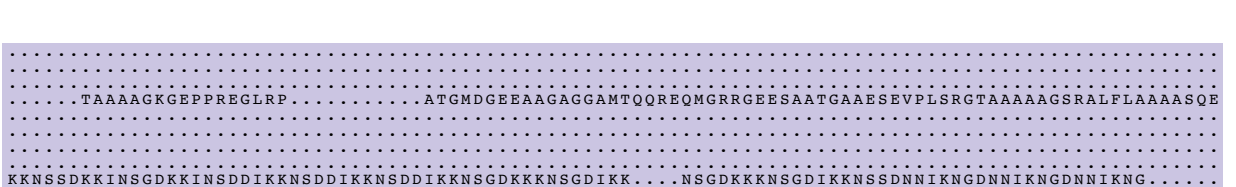

C-terminal extension

TgRON13/1-1375

TgRON13/1-1375
HHA\_321650/1-1376
NCLIV\_004270/1-1118
SN3\_00900895/1-1424
BESB\_024160/1-1353
CSUI\_007316/1-481
ETH\_00018465/1-1314
cyc\_03129/1-1343
PF3D7\_1321100/1-3447

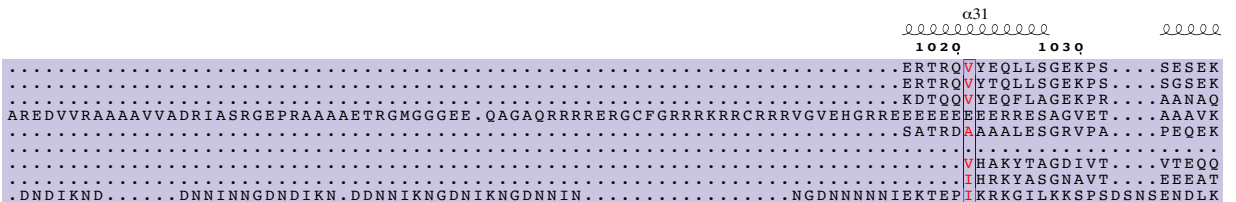

C-terminal extension

TgRON13/1-1375

TgRON13/1-1375
HHA\_321650/1-1376
NCLIV\_004270/1-1118
SN3\_00900895/1-1424
BESB\_024160/1-1353
CSUI\_007316/1-481
ETH\_00018465/1-1314
cyc\_03129/1-1343
PF3D7\_1321100/1-3447

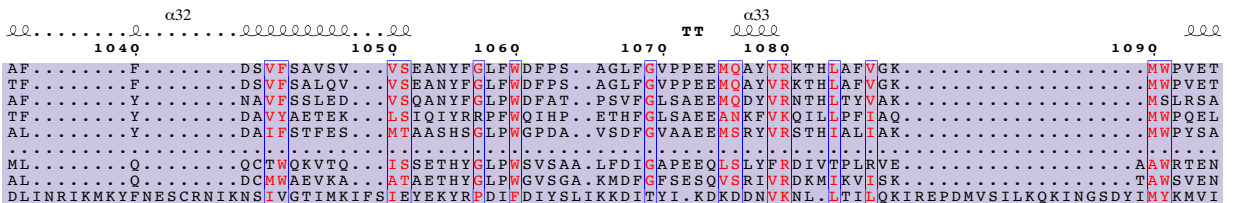

C-terminal extension

TgRON13/1-1375

TgRON13/1-1375
HHA\_321650/1-1376
NCLIV\_004270/1-1118
SN3\_00900895/1-1424
BESB\_024160/1-1353
CSUI\_007316/1-481
ETH\_00018465/1-1314
cyc\_03129/1-1343
PF3D7\_1321100/1-3447

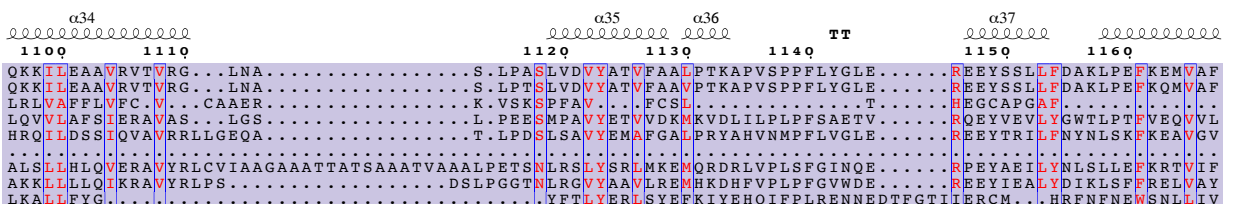

C-terminal extension

*TgRON13/1-1375*  $\alpha 38$   $\alpha 39$

WA.....T R H E L N I A V Q T A V G K T P D A T N L S . D . E ..... D I E K Q L E G M L T ..... P A H L R S P S P A R F G W P P E A V . A D N I R L F I R  
HHA\_321650/1-1376 WA.....T R H E L N L A V Q T A V G K T P D A T N L S . D . E ..... D I E K Q L E G L L ..... P A H L R S P S P A R F G W P P E A L . A D N I R L F I R  
NCLIV\_004270/1-1118 QS.....F R H L L R L R I R E R L S A V S S D A A F A A R M V V ..... S K E S V V R E E A D Y M R ..... H V Y A E T T S F R Y G W E P H Q L K A R L . Q Q M V Q  
SN3\_00900895/1-1424 AA.....T R H E L K I A V E K A V D A L G A D A E K S N D E E ..... L A E N L M K E L L ..... P Q H I R I A P P A R F G W K E Q A N I R T S I L D F V K  
BESB\_024160/1-1353 CSUI\_007316/1-481 TA.....T K R Q L G I V T K E I L K S M R T R S R A A A T A S ..... R L S L I ..... P E S . I L A W Q R Y A P E E T A L . R V I R E V V E  
ETH\_00018465/1-1314 TA.....T K E E L S K K A A E I L H A L D P E E R A K F S V A ..... T L R G K I ..... P E S . M R A P E R F G L T E Q I G E . G V L E G V L T  
cyc\_03129/1-1343 Q H I Y N N Y M S K K Y T N L Y I N L H L N L K P N D E K K K E M E E L Y D K H M T E V F K D I D Y N D N F N N F L Y M K K E S E D I S N T L K E K N N M K T G W D N F H I N Y D D I Y D . . .  
PF3D7\_1321100/1-3447

*TgRON13/1-1375*  $\beta 9$

EAK . D E L A L H G P D M V H N R I ..... R V N G R S K P P R R A A .....  
HHA\_321650/1-1376 EAK . E E L A L H G P D M V H D R I ..... R V N G R S K P P R R A A .....  
NCLIV\_004270/1-1118 E E F . D F V R E T L P L V R T T I ..... R T N G V A R S S Q S E N .....  
SN3\_00900895/1-1424 D V R . R R R S L A G P D M V Q V R I ..... R I N G K S K P P R D A S .....  
BESB\_024160/1-1353 CSUI\_007316/1-481 K E I D I I N T P K R S G L I S F W I ..... S T N G P F V R S K E T N .....  
ETH\_00018465/1-1314 E A L Y N A R K P E V E G L T T L S V ..... S V N G A F L R S P K T N .....  
cyc\_03129/1-1343 P F 3 D 7 \_ 1 3 2 1 1 0 0 / 1 - 3 4 4 7 . . . . . K H D E K D L S E I R K T T L K L D N S V I R D M N I N L A I L L N D M P W K H K N R C K G V N Y N H M K V Y A D N T I K E F N I Q K N P I I D L H K P I G S I V K G L I K N D D I M I S

*TgRON13/1-1375*

TgRON13/1-1375 .....  
HHA\_321650/1-1376 .....  
NCLIV\_004270/1-1118 .....  
SN3\_00900895/1-1424 .....  
BESB\_024160/1-1353 .....  
CSUI\_007316/1-481 .....  
ETH\_00018465/1-1314 .....  
cyc\_03129/1-1343 .....  
PF3D7\_1321100/1-3447 K G H T N I N T L D Y I I P I N I H L D V I L Q N S L H F V Y T S T L I K C A E K M D K G G I Y H R D I T Y N R K K E T I K I K I G L I S N S Y F Y L N V D I S Y L R Y H E I T L K D I I Y F I Y R

*TgRON13/1-1375*  $\beta 10$   $\alpha 40$   $\eta 6$   $\beta 11$

..... F L F H E I F R K A I A F K K D I S V L Q F N O F T D I L K ..... Q S F D P Q C R R F I A . E V K K R V K S A P A E Y V  
HHA\_321650/1-1376 ..... F L F H E I F R K P I A F K K D I S V L Q F N O F T D I L K ..... Q S F D P Q C R R F I A . E V K K R V K D A P A E Y V  
NCLIV\_004270/1-1118 ..... S R I F R I L T K T F F L Y P D T T V G E V N R F F T R L L R ..... R S Y N V R C Q T Y V A . S E R R L V E G P E P S Y E  
SN3\_00900895/1-1424 ..... L V L H E I R K L V A F K S G V S V S Q N E F F T R V L K ..... E S F N P F C R S F V A . E L K K R I K R S P A E Y E  
BESB\_024160/1-1353 CSUI\_007316/1-481 ..... S R A G I L V M K Q I Q M Y P K T T A A H F N R H F T E V L R ..... S S L A P G C E R Y S A . I L K R Q E A . D G T F T  
ETH\_00018465/1-1314 ..... R Q I G R P A V K H L K L P P E A T A G Y V N E H F T N I L A ..... T S L C P P V W V L L R S I R S S L A P G C S R Y K A . I L K R K M A . S G K Y E  
cyc\_03129/1-1343 P F 3 D 7 \_ 1 3 2 1 1 0 0 / 1 - 3 4 4 7 N Y K S E L N K S V R S N I E K R S F L F F D C L L V N E Y N T F F Y N N S P K K L I K E T S F N K L I S Q L Y N I N L N D P E Y I I K S T I N . Y N H R K S N M P L I S L V T I S H T I H E R W N

*TgRON13/1-1375*  $\alpha 41$   $\beta 12$   $\alpha 1$   $\beta 13$

R V . . . A D T E A V A P L F E G ..... E G K D I L K L V A V D P A ..... A R A S D P E P N N C F L W T Q A F L D D K T I V V S .....  
HHA\_321650/1-1376 R V . . . A E T E A V A P L F E G ..... D G K D I L K L V A V D P A ..... A R A S D P E P N N C F L W T Q A F L D E K T I V V G .....  
NCLIV\_004270/1-1118 P V . . . L P Y K A A P L L E T ..... R G G R K F K L V A T P V ..... D P T P A F P I R N C F L W T R E F L Q D R G I V M S .....  
SN3\_00900895/1-1424 T V . . . S G D T A L V L L G Q ..... D G S S I E H F L V A V D P S ..... V Q G S A S E P N N C F I W T P A F L A D E K I I V I E A A . . . D A . . . . .  
BESB\_024160/1-1353 CSUI\_007316/1-481 P V . . . D P T E Q . . . L L G G ..... D E Q K D K F R L F A V P P E ..... T G S N R R L L N N C F L W T A P F L S P D P F V V P A P G . . P A A D Q V V I D M P Y . .  
ETH\_00018465/1-1314 A L . . . E N T E I . . . L Q G G ..... E G Q K D R L R L Y A V P P A ..... T G T N A R T P N N C F L W T A E I L R P E S Y T V L P A A . . . P S P . . . . .  
cyc\_03129/1-1343 P F 3 D 7 \_ 1 3 2 1 1 0 0 / 1 - 3 4 4 7 G I K K Q T D Y I L Q P S I N N Y S D E Y N E E L I D P S K L K F K N P S L N I K E N M N R I I M R N R Y E G Y Q Y R L V K C F D F . . . L H K K N I S Y K D Q H T T N L F D Q I I P A V F I H

*TgRON13/1-1375*

TgRON13/1-1375 .....  
HHA\_321650/1-1376 .....  
NCLIV\_004270/1-1118 .....  
SN3\_00900895/1-1424 .....  
BESB\_024160/1-1353 .....  
CSUI\_007316/1-481 .....  
ETH\_00018465/1-1314 .....  
cyc\_03129/1-1343 .....  
PF3D7\_1321100/1-3447 L K N D D I S K I N I G L A L E H R K I K F N I T D I M N L Q I E N Q I F T L T D F M Y L I F R W L E T Y I S F N D R D H C T F L T D R T Q I S Q Y D L V L S I E T G K D K I N I L Y K N N E G V

*TgRON13/1-1375*

TgRON13/1-1375 .....  
HHA\_321650/1-1376 .....  
NCLIV\_004270/1-1118 .....  
SN3\_00900895/1-1424 .....  
BESB\_024160/1-1353 .....  
CSUI\_007316/1-481 .....  
ETH\_00018465/1-1314 .....  
cyc\_03129/1-1343 .....  
PF3D7\_1321100/1-3447 I K F I F Q N L K N H Q V N Q Y T S E F L M S A I K L N L K L F F V L K D E L K Y I F P D I P E G L Y F H L K E S N Y K I I N C L K E L D G K N V K L L E N N I Y D D S V P V K I K F M N V T V

*TgRON13/1-1375*

TgRON13/1-1375 .....  
HHA\_321650/1-1376 .....  
NCLIV\_004270/1-1118 .....  
SN3\_00900895/1-1424 .....  
BESB\_024160/1-1353 .....  
CSUI\_007316/1-481 .....  
ETH\_00018465/1-1314 .....  
cyc\_03129/1-1343 .....  
PF3D7\_1321100/1-3447 I Y R I K K D N F K N I I Y N F T K Y E V L K H Y G K Q L F T R F I S P I N D I E N K F R Y L F L R D L S Y Y D I P R I K R D K D D F M V S M D S N V N Y A L N E K H N I Y M N Y S S I E K M

*TgRON13/1-1375*

TgRON13/1-1375 .....  
HHA\_321650/1-1376 .....  
NCLIV\_004270/1-1118 .....  
SN3\_00900895/1-1424 .....  
BESB\_024160/1-1353 .....  
CSUI\_007316/1-481 .....  
ETH\_00018465/1-1314 .....  
cyc\_03129/1-1343 .....  
PF3D7\_1321100/1-3447 ITYMNVTYTEPVFIVCVVKHTVLGSKIQLLLREMKNITS
